# Supplementary material for: 7-N-Substituted-3-oxadiazole Quinolones with Potent Antimalarial Activity Target the Cytochrome bc1 Complex
Source: PubMed Central journal article supplement — ACS Infect Dis. 2023 Feb 28;9(3):668–91. doi: 10.1021/acsinfecdis.2c00607 (PMC10012268; doi:10.1021/acsinfecdis.2c00607), 2023-02-28
Supplement: id2c00607_si_001.pdf [file id2c00607_si_001.pdf]

## **7-*N*-Substituted-3-Oxadiazole Quinolones with Potent Antimalarial Activity Target the Cytochrome bc<sub>1</sub> Complex**

William Nguyen,<sup>a,b,#</sup> Madeline G. Dans,<sup>a,b,#</sup> Iain Currie,<sup>a,b</sup> Jon Kyle Awalt,<sup>a,b</sup> Brodie L. Bailey,<sup>a,b</sup> Chris Lumb,<sup>a</sup> Anna Ngo,<sup>a</sup> Paola Favuzza,<sup>a,b</sup> Josephine Palandri,<sup>a,b</sup> Saishyam Ramesh,<sup>c</sup> Jocelyn Penington,<sup>a,b</sup> Kate E. Jarman,<sup>a,b</sup> Partha Mukherjee,<sup>d</sup> Arnish Chakraborty,<sup>d</sup> Alexander G. Maier,<sup>c</sup> Giel G. van Dooren,<sup>c</sup> Tony Papenfuss,<sup>a,b</sup> Sergio Wittlin,<sup>e,f</sup> Alisje Churchyard,<sup>g</sup> Jake Baum,<sup>g,h</sup> Elizabeth A. Winzeler,<sup>i</sup> Delphine Baud,<sup>j</sup> Stephen Brand,<sup>j</sup> Paul F. Jackson,<sup>k</sup> Alan F. Cowman,<sup>a,b</sup> and Brad E. Sleebs.<sup>a,b,\*</sup>

<sup>a</sup> The Walter and Eliza Hall Institute of Medical Research, Parkville 3052, Australia.

<sup>b</sup> Department of Medical Biology, The University of Melbourne, Parkville 3010, Australia.

<sup>c</sup> Research School of Biology, The Australian National University, Canberra 2600, Australia.

<sup>d</sup> TCG Lifesciences, Kolkata, West Bengal, 700091, India.

<sup>e</sup> Swiss Tropical and Public Health Institute, Kreuzstrasse 2, 4123 Allschwil, Switzerland.

<sup>f</sup> University of Basel, 4003 Basel, Switzerland.

<sup>g</sup> Department of Life Sciences, Imperial College London, South Kensington, SW7 2AZ UK.

<sup>h</sup> School of Biomedical Sciences, University of New South Wales, Sydney, 2031, Australia.

<sup>i</sup> School of Medicine, University of California San Diego, 9500 Gilman Drive 0760, La Jolla, CA, 92093, USA

<sup>j</sup> Medicines for Malaria Venture, Geneva 1215, Switzerland.

<sup>k</sup> Global Public Health, Janssen R&D LLC, La Jolla 92121, USA.

\* Correspondence to:

Brad E. Sleebs

The Walter and Eliza Hall Institute of Medical Research

1G Royal Parade, Parkville 3052, Victoria, Australia

Email: [sleebs@wehi.edu.au](mailto:sleebs@wehi.edu.au)

# These authors contributed equally.

## Index

| Page      |                                                                             |
|-----------|-----------------------------------------------------------------------------|
| S3 – S4   | Schemes S1-5 Synthetic pathways for specific analogues and intermediate     |
| S5        | Figure S1 <i>P. falciparum</i> 3D7 asexual dose response curves             |
| S6        | Figure S2 Biological repeats for asexual stage of arrest microscopy         |
| S7        | Figure S3 Modelling on <i>cyt b</i>                                         |
| S8        | Figure S4 SNP in <i>cyt b</i> gene from <b>41</b> resistant parasites       |
| S9        | Figure S5 <i>P. falciparum</i> ScDHODH and SB1-A6 dose response curves      |
| S10       | Figure S6 <i>P. falciparum</i> NF54 gamete dose response curves             |
| S11       | Figure S7 Mouse model and plasma bioanalysis data                           |
| S12       | Table S1 SNPs from whole genome sequencing of <b>41</b> resistant parasites |
| S13       | Table S2 Activity of compounds against <b>41</b> resistant parasites        |
| S14       | Table S3 Activity of compounds against drug resistant parasites             |
| S15       | Table S4 Activity of compounds against drug resistant parasites             |
| S16 – S30 | <sup>1</sup> H NMR for final compounds                                      |
| S31 – S36 | HPLC traces for final compounds                                             |
| S37       | References                                                                  |

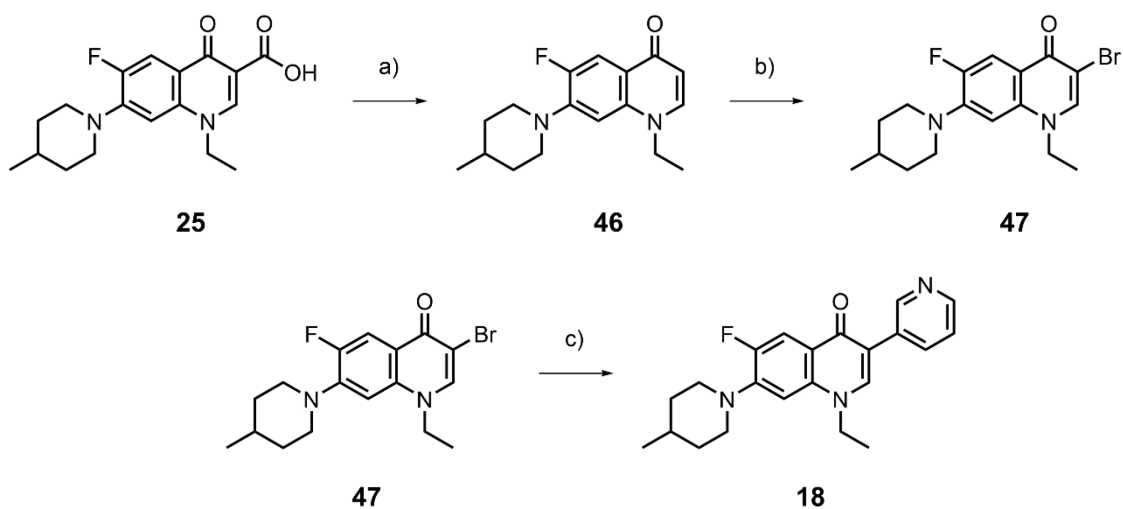

**Scheme S1.** Synthesis of **18**. *Reagents and conditions:* (a) 37% HCl, 20 °C (b) Br<sub>2</sub>, AcOH, 20 °C; (c) 3-pyridylboronic acid, K<sub>2</sub>CO<sub>3</sub>, Pd(PPh<sub>3</sub>)<sub>4</sub>, 1,4-dioxane/H<sub>2</sub>O (6:1), 100 °C.

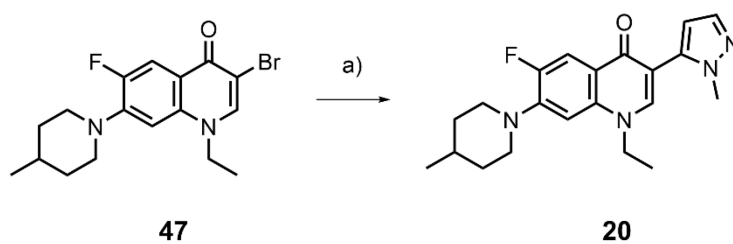

**Scheme S2.** Synthesis of **20**. *Reagents and conditions:* (a) 1-methylpyrazole-5-boronic acid pinacol ester, K<sub>2</sub>CO<sub>3</sub>, Pd(PPh<sub>3</sub>)<sub>4</sub>, 1,4-dioxane/H<sub>2</sub>O (6:1), 100 °C.

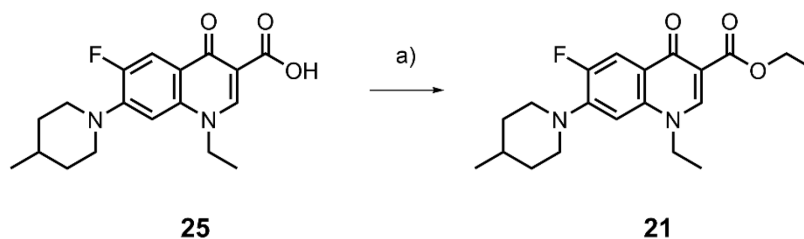

**Scheme S3.** Synthesis of **21**. *Reagents and conditions:* (a) H<sub>2</sub>SO<sub>4</sub>, EtOH, 78 °C.

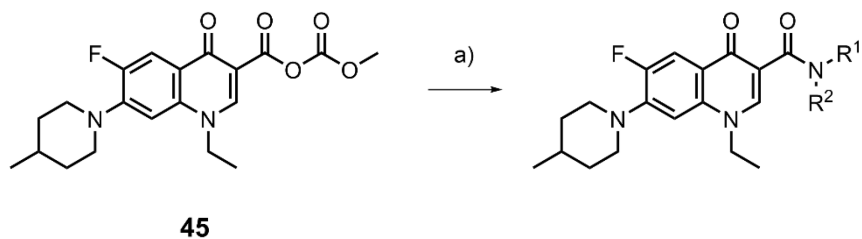

**Scheme S4.** Synthesis of **22**, **23** and **24**. *Reagents and conditions:* (a) substituted amine, 20 °C.

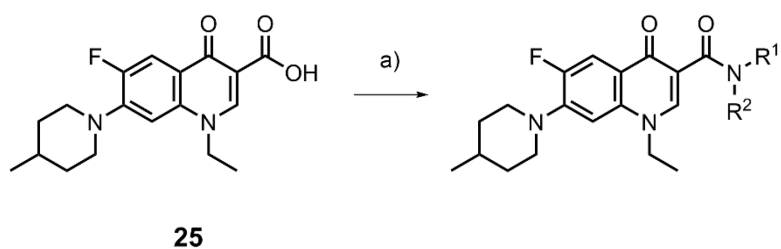

**Scheme S5.** Synthesis of **26** and **27**. *Reagents and conditions:* (a) substituted secondary amine, HATU, DIPEA, DMF, 20 °C.

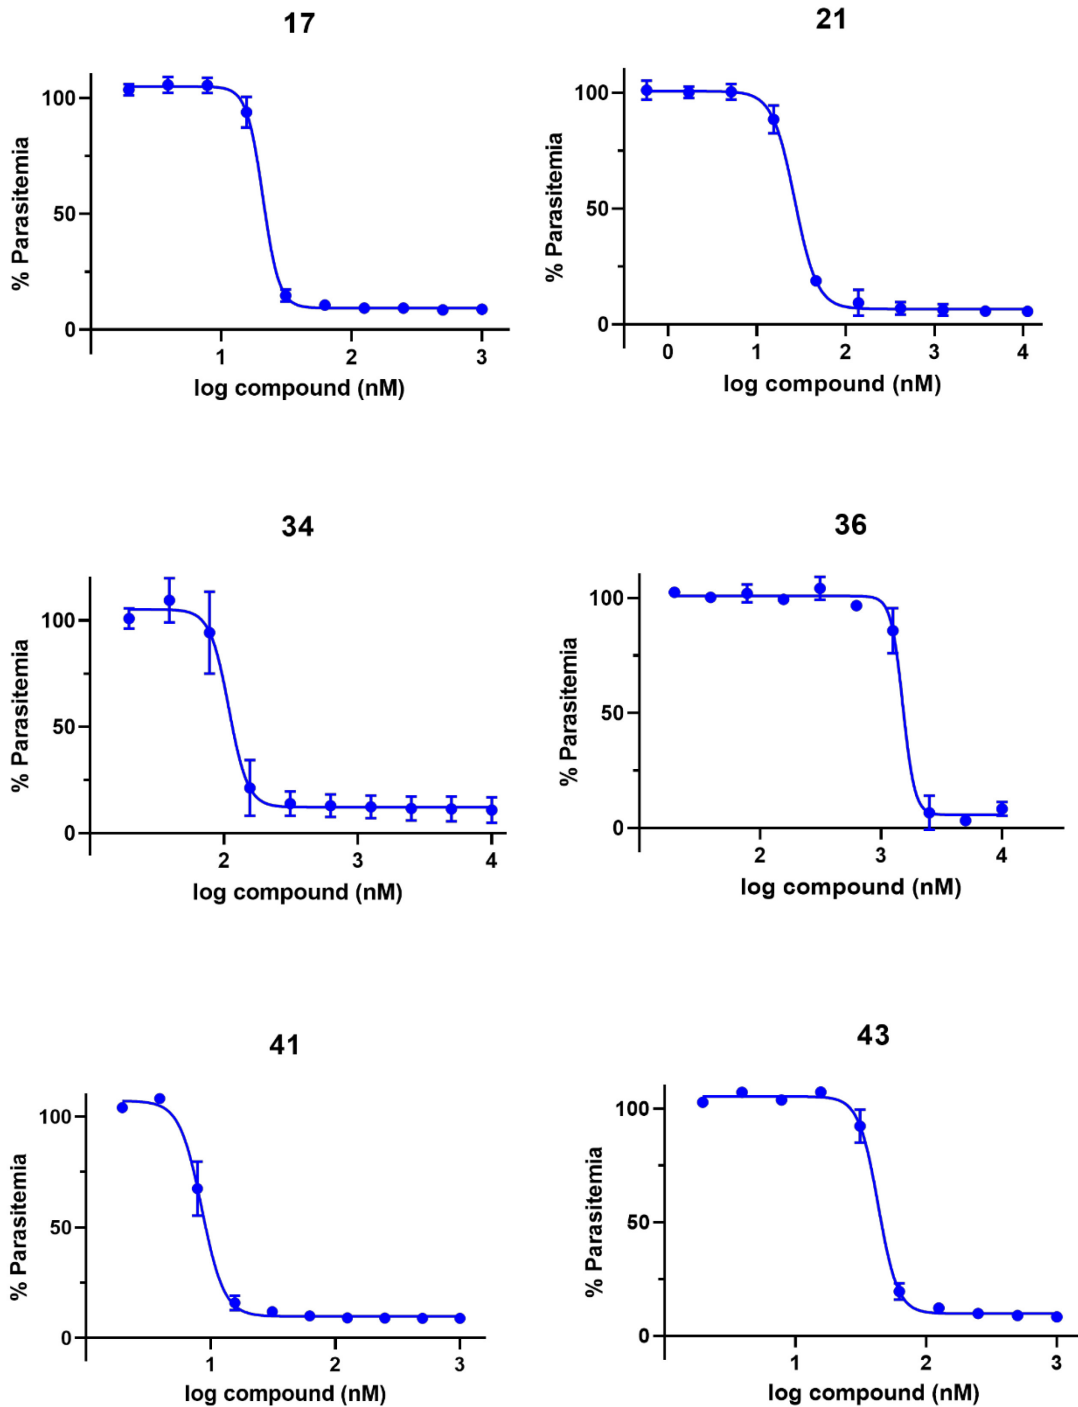

**Figure S1.** *P. falciparum* 3D7 asexual LDH dose response curves of representative compounds. EC<sub>50</sub> data represents means and SDs for four or more technical replicates measuring LDH activity of *P. falciparum* 3D7 parasites following exposure to compounds in 10-point dilution series for 72 h.

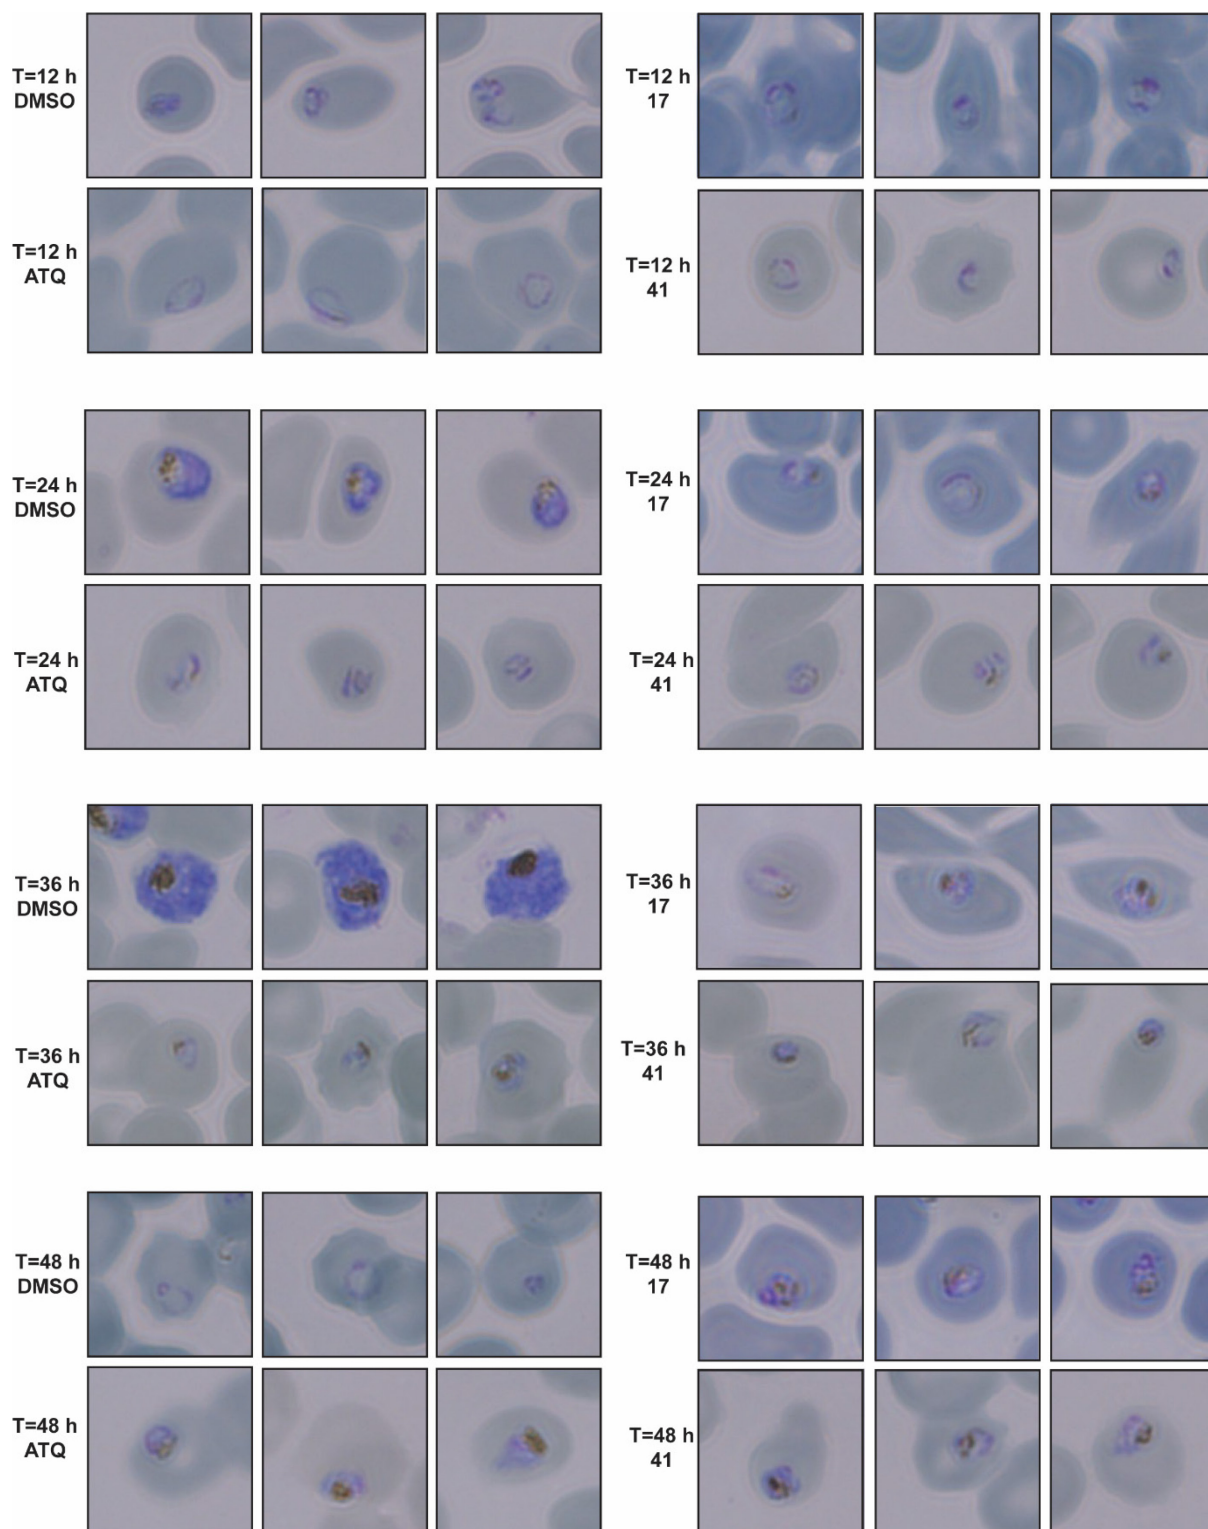

**Figure S2.** Giemsa stained microscopy images showing the asexual stage of arrest treated with ATQ (**3**), **17** and **41** at different time points to support representative images shown in Figure 2B.

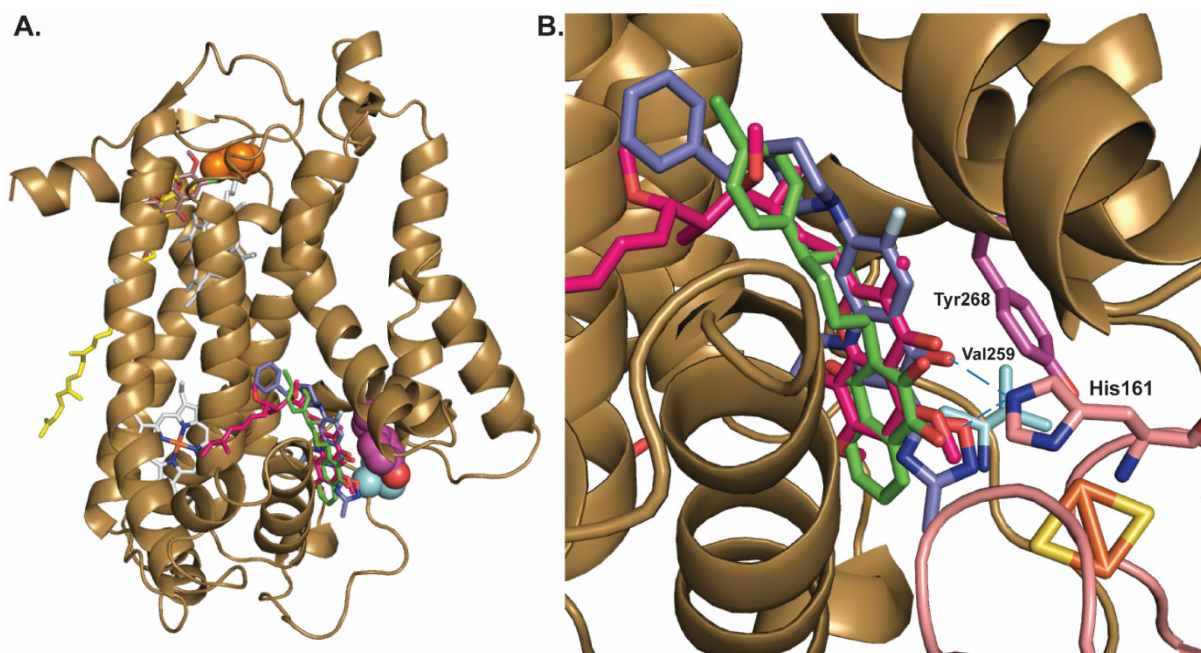

**Figure S3.** A. A homology model of *P. falciparum* cyt *b* showing mutations found in **41**, ELQ300 and ATQ *P. falciparum* resistant strains is shown in Figure 3 and Table 5 respectively. The homology model of *P. falciparum* cyt *b* was created from *Gallus gallus* cyt *bc*<sub>1</sub> (PDB: 3H11).<sup>1</sup> TM90-C2B strain cyt *b* Y268S Q<sub>o</sub> site mutation is shown in magenta; Dd2 strain cyt *b* I222L Q<sub>i</sub> site mutant is shown in orange; 3D7 **41** resistant strain cyt *b* V259L Q<sub>o</sub> site mutation is shown in cyan. Heme molecules are shown in grey. The relative position of **41** (blue) is predicted by docking to the Q<sub>o</sub> site, while ATQ (green) and ubiquinol (pink) in the Q<sub>o</sub> site, and ELQ300 (brown), ubiquinone (yellow) in the Q<sub>i</sub> site were overlaid using previous structural data.<sup>2,3</sup> B. Q<sub>o</sub> site of cyt *b* showing the interaction of **41** with Rieske protein (salmon) and the proximity to Fe-S cluster (orange/yellow).

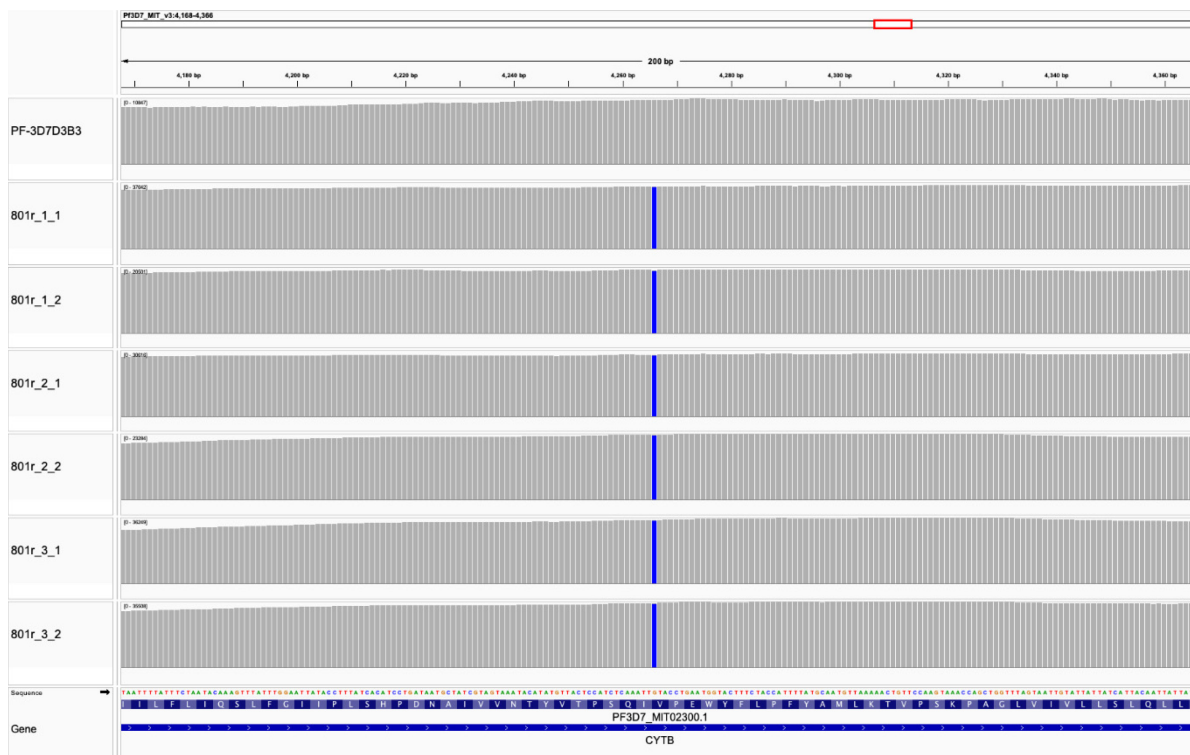

**Figure S4.** Non-synonymous single nucleotide polymorphism identified in *cyt b* (PF3D7\_MIT02300) from compound **41** resistant parasite populations r1, r2 and r3 (samples in duplicate).



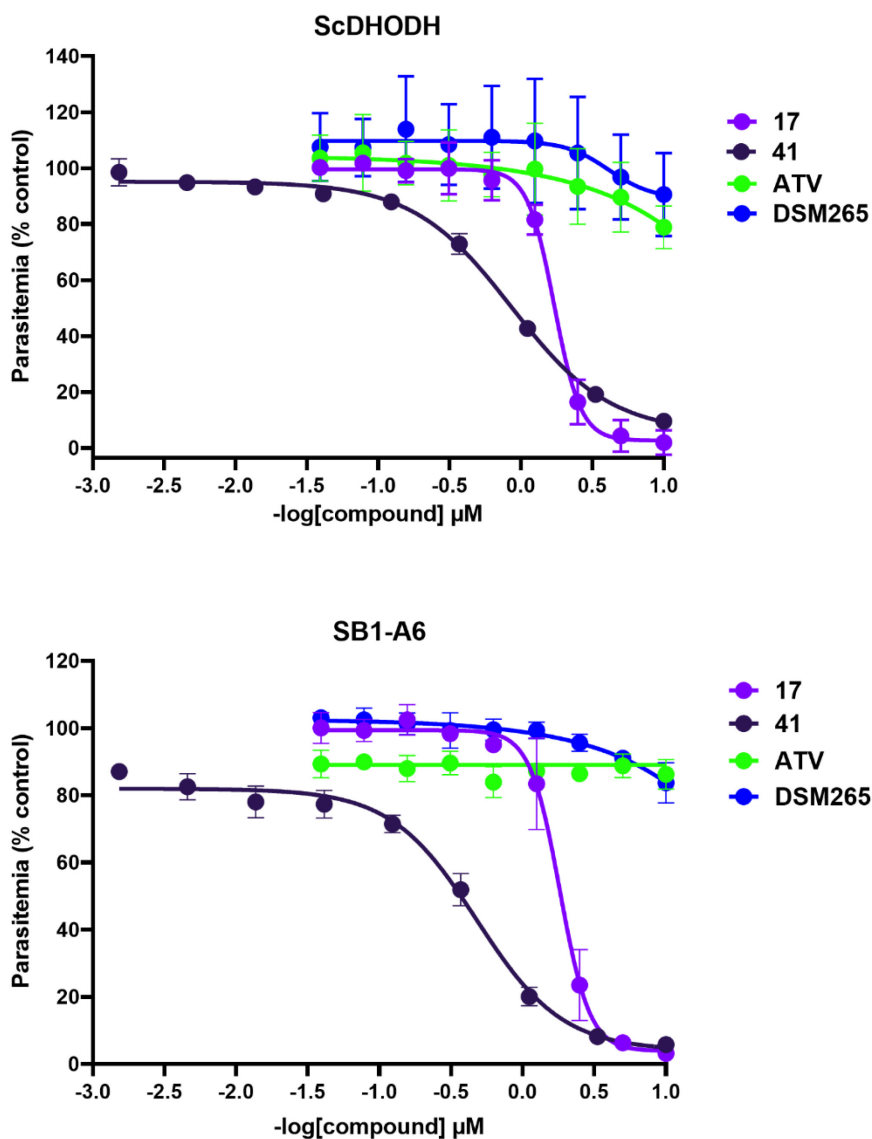

**Figure S5.** Dose response curves represent averages and SDs of 3 independent experiments against the Pf SB1-A6 strain with a CNV (~2-fold) and a C276F mutation in DHODH or Pf Dd2 expressing ScDHODH over 72 h measuring SYBR green by FACS.

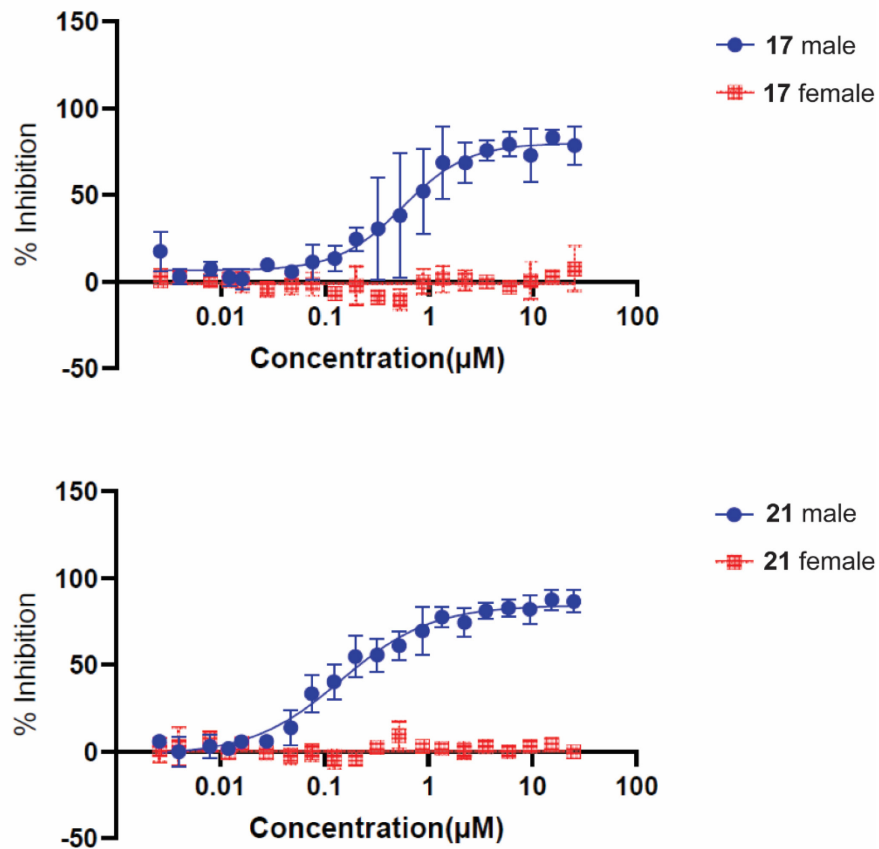

**Figure S6.** *P. falciparum* NF54 DFGA dose response curves from a 20-pt dilution series of compounds **17** and **21**. Data represents means and SD of 4 technical replicates.

A.

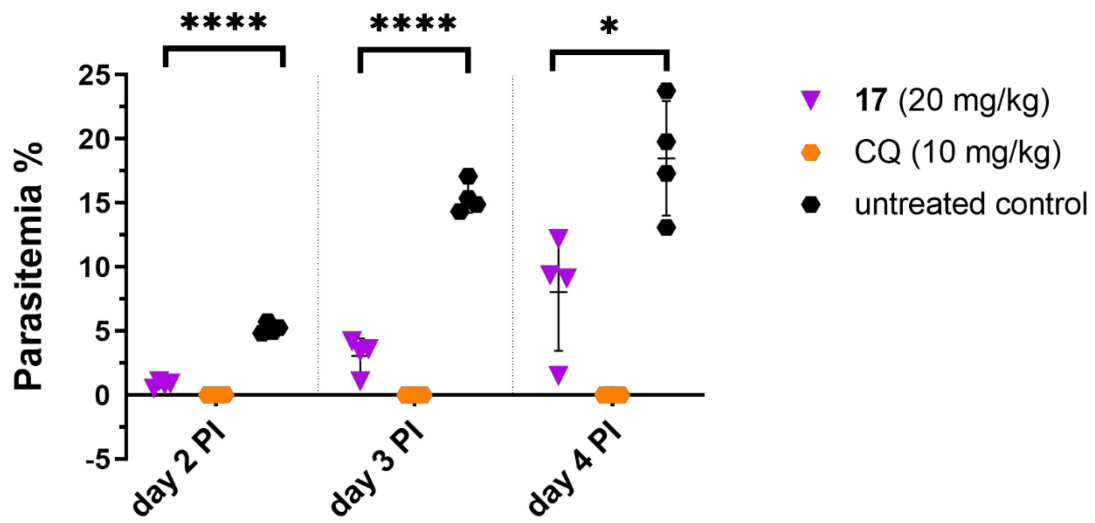

B.

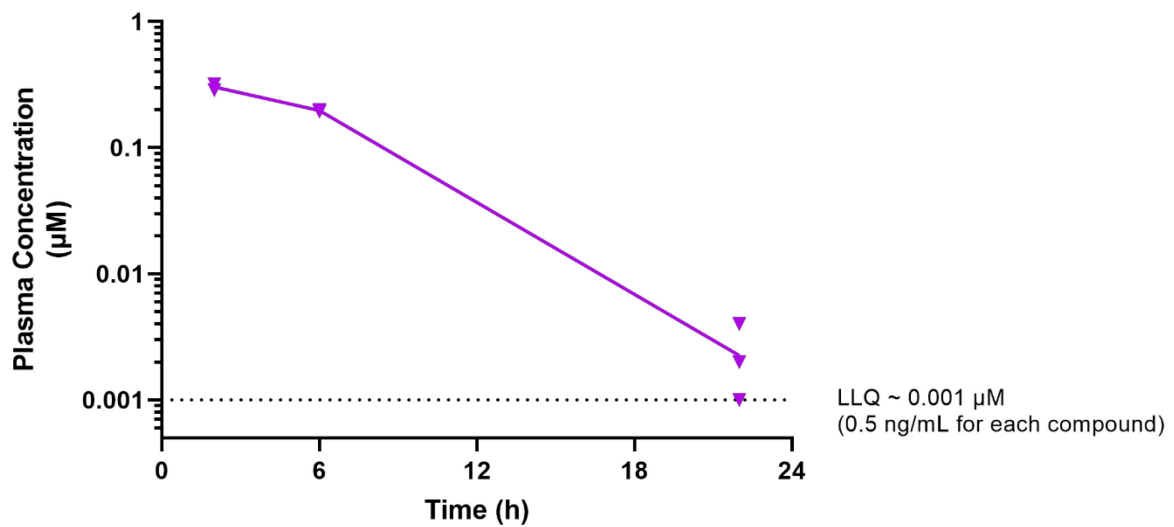

**Figure S7. A.** Evaluation of **17** in a *P. berghei* 4 day mouse model. *P. berghei ANKA* parasites expressing GFP were injected into the tail vein to infect mice on day 0. Compound **17** was administered q.d. at 20 mg/kg by p.o. 2 h after infection (day 0) and then on days 1, 2, and 3. Parasitemia was measured by flow cytometry on days 2, 3 and 4. unpaired t test (vs vehicle), P values. **B.** Plasma concentration of **17** after dose 1 in the *P. berghei* mouse model.

**Table S1.** Non-synonymous and synonymous single nucleotide polymorphisms identified from compound **41** resistant genomes.

| Chromosome               | Pos     | Base Change | AA change  | AA pos in transcript | transcript ID    |
|--------------------------|---------|-------------|------------|----------------------|------------------|
| Pf3D7_02_v3 <sup>a</sup> | 110010  | A->C        | F->V       | 155                  | PF3D7_0202100.1  |
| Pf3D7_10_v3 <sup>b</sup> | 1436924 | T->G        | D->E       | 203                  | PF3D7_1036400.1  |
| Pf3D7_10_v3              | 1436954 | A->G        | Synonymous | 213                  | PF3D7_1036400.1  |
| Pf3D7_10_v3              | 1437149 | G->A        | Synonymous | 278                  | PF3D7_1036400.1  |
| Pf3D7_10_v3              | 1437158 | A->G        | Synonymous | 281                  | PF3D7_1036400.1  |
| Pf3D7_10_v3              | 1437287 | T->A        | Synonymous | 324                  | PF3D7_1036400.1  |
| Pf3D7_10_v3              | 1437302 | G->A        | Synonymous | 329                  | PF3D7_1036400.1  |
| Pf3D7_10_v3              | 1437305 | A->G        | Synonymous | 330                  | PF3D7_1036400.1  |
| Pf3D7_10_v3              | 1437307 | A->G        | E->G       | 331                  | PF3D7_1036400.1  |
| Pf3D7_10_v3              | 1437321 | T->C        | Synonymous | 336                  | PF3D7_1036400.1  |
| Pf3D7_10_v3              | 1437456 | C->A        | Q->K       | 381                  | PF3D7_1036400.1  |
| Pf3D7_10_v3              | 1437695 | T->A        | Synonymous | 460                  | PF3D7_1036400.1  |
| Pf3D7_10_v3              | 1437701 | A->G        | Synonymous | 462                  | PF3D7_1036400.1  |
| Pf3D7_14_v3              | 3000703 | T->C        | Synonymous | 551                  | PF3D7_1473700.1  |
| Pf3D7_14_v3              | 3000763 | C->T        | Synonymous | 531                  | PF3D7_1473700.1  |
| Pf3D7_MIT_v3             | 4266    | G->C        | V->L       | 259                  | PF3D7_MIT02300.1 |

<sup>a</sup> Pf3D7\_02\_v3:110010 is a miscall due to a deletion.

<sup>b</sup> Pf3D7\_10\_v3:1436924 is present in the WT parent at 29%.

**Table S2.** EC<sub>50</sub> values (nM) of **17**, **41**, ATQ and ELQ300 against **41** resistant populations (with a V259L *cyt b* Q<sub>o</sub> site mutation). EC<sub>50</sub> values represent an average of 3 experiments using the LDH assay (Figure 3).

| compound  | <b>3D7</b>          | <b>41 r#1</b>       | <b>41 r#2</b>       | <b>41 r#3</b>       |
|-----------|---------------------|---------------------|---------------------|---------------------|
| <b>41</b> | 32.1<br>(21.5-47.1) | 809<br>(593-1234)   | 733<br>(533-1171)   | 896<br>(701-1131)   |
| <b>17</b> | 7.622<br>(4.0-10.7) | 369<br>(282-491)    | 248<br>(213-289)    | 235<br>(204-272)    |
| ATQ       | 1.6<br>(1.1-2.1)    | 13.0<br>(10.9-15.5) | 11.9<br>(9.6-14.6)  | 13.7<br>(11.2-16.6) |
| ELQ-300   | 17.8<br>(14.8-21.1) | 13.0<br>(10.9-15.5) | 12.3<br>(10.3-14.6) | 12.4<br>(10.3-14.8) |

<sup>a</sup> EC<sub>50</sub> values (95% confidence intervals) from 3 biological replicates (nM).

**Table S3.** Evaluation of selected compounds against *P. falciparum* asexual parasites resistant to mitochondria targeted drugs.

| Cmpd          | Pf Dd2 EC <sub>50</sub><br>μM <sup>a</sup> | Pf cytBC1 mutant strains<br>EC <sub>50</sub> μM |                                          |
|---------------|--------------------------------------------|-------------------------------------------------|------------------------------------------|
|               |                                            | TM90-C2B <sup>a</sup>                           | Dd2 <sup>cyt b</sup> (I22L) <sup>a</sup> |
| <b>17</b>     | 0.010                                      | 1.91                                            | 0.006                                    |
|               | 0.008                                      | 1.29                                            | 0.007                                    |
| <b>21</b>     | 0.062                                      | 0.051                                           | 0.051                                    |
|               | 0.048                                      | 0.030                                           | 0.030                                    |
| <b>41</b>     | 0.005                                      | 0.177                                           | 0.003                                    |
|               | 0.003                                      | 0.206                                           | 0.002                                    |
| <b>43</b>     | 0.017                                      | 0.069                                           | 0.014                                    |
|               | 0.013                                      | 0.042                                           | 0.009                                    |
| <b>ATQ</b>    | 0.001                                      | 6.46                                            | 0.005                                    |
|               |                                            | 4.35                                            |                                          |
| <b>ELQ300</b> | 0.027                                      | -                                               | 0.194                                    |
|               | 0.014                                      |                                                 | 0.157                                    |
| <b>DSM265</b> | 0.028                                      | -                                               | 0.008                                    |
|               | 0.020                                      |                                                 |                                          |

<sup>a</sup> Activity values against the PfDd2 parental line, Pf TM90-C2B strain with a Y268S mutation in the Q<sub>o</sub> site of *cyt b* or PfDd2 strain with an I22L mutation in the Q<sub>i</sub> site *cyt b* using a <sup>3</sup>H-hypoxanthine 72 h assay. EC<sub>50</sub> values are an average of two experiments. Average data is shown in Table 4.

**Table S4.** Activity of selected compounds against drug resistant *P. falciparum* strains.

| Cmpd                  | Dd2<br>EC <sub>50</sub> μM <sup>a</sup> | Pf multidrug resistant strains. EC <sub>50</sub> μM <sup>a</sup> |                         |                       |                        |       |       |       |       |
|-----------------------|-----------------------------------------|------------------------------------------------------------------|-------------------------|-----------------------|------------------------|-------|-------|-------|-------|
|                       |                                         | Dd2<br>CARL<br>(I1139K)                                          | Dd2<br>DHODH<br>(C276F) | Dd2<br>eEF2<br>(Y86N) | Dd2<br>PI4K<br>(S743T) | K1    | NF54  | RF12  | 7G8   |
| <b>17</b>             | 0.011                                   | 0.009                                                            | 0.018                   | 0.008                 | 0.011                  | 0.013 | 0.019 | 0.007 | 0.008 |
|                       | 0.009                                   | 0.010                                                            | 0.013                   | 0.008                 | 0.011                  | 0.007 | 0.006 | 0.005 | 0.010 |
| <b>21</b>             | 0.062                                   | 0.014                                                            | -                       | 0.016                 | 0.023                  | 0.016 | 0.041 | 0.014 | 0.036 |
|                       | 0.048                                   | 0.029                                                            | -                       | 0.020                 | 0.031                  | 0.033 | 0.047 | 0.023 | 0.040 |
| <b>41</b>             | 0.004                                   | 0.004                                                            | 0.006                   | 0.002                 | 0.005                  | 0.006 | 0.006 | 0.002 | 0.003 |
|                       | 0.004                                   | 0.004                                                            | 0.003                   | 0.003                 | 0.005                  | 0.004 | 0.003 | 0.001 | 0.002 |
| <b>43</b>             | 0.017                                   | 0.005                                                            | -                       | 0.004                 | 0.009                  | 0.009 | 0.008 | 0.004 | 0.015 |
|                       | 0.014                                   | 0.009                                                            | -                       | 0.008                 | 0.010                  | 0.021 | 0.028 | 0.006 | 0.010 |
| <b>KAF156</b>         | 0.008                                   | 1.36                                                             | -                       | -                     | -                      | -     | -     | -     | -     |
|                       | 0.008                                   | 1.69                                                             | -                       | -                     | -                      | -     | -     | -     | -     |
| <b>DSM265</b>         | 0.027                                   | -                                                                | 0.576                   | -                     | -                      | -     | -     | -     | -     |
|                       | 0.020                                   | -                                                                | 0.362                   | -                     | -                      | -     | -     | -     | -     |
| <b>DDD<br/>107498</b> | 0.001                                   | -                                                                | -                       | 0.859                 | -                      | -     | -     | -     | -     |
|                       | 0.022                                   | -                                                                | -                       | 0.842                 | -                      | -     | -     | -     | -     |
| <b>MMV<br/>048</b>    | 0.009                                   | -                                                                | -                       | -                     | 0.117                  | -     | -     | -     | -     |
|                       | 0.022                                   | -                                                                | -                       | -                     | 0.116                  | -     | -     | -     | -     |

<sup>a</sup> EC<sub>50</sub> data represents means for each <sup>3</sup>H-hypoxanthine experiment using a selection of drug resistant *P. falciparum* strains following exposure to compounds in 10-point dilution series for 72 h. Average data is shown in Table 5.

# <sup>1</sup>H NMR spectra for final compounds

## Compound 16

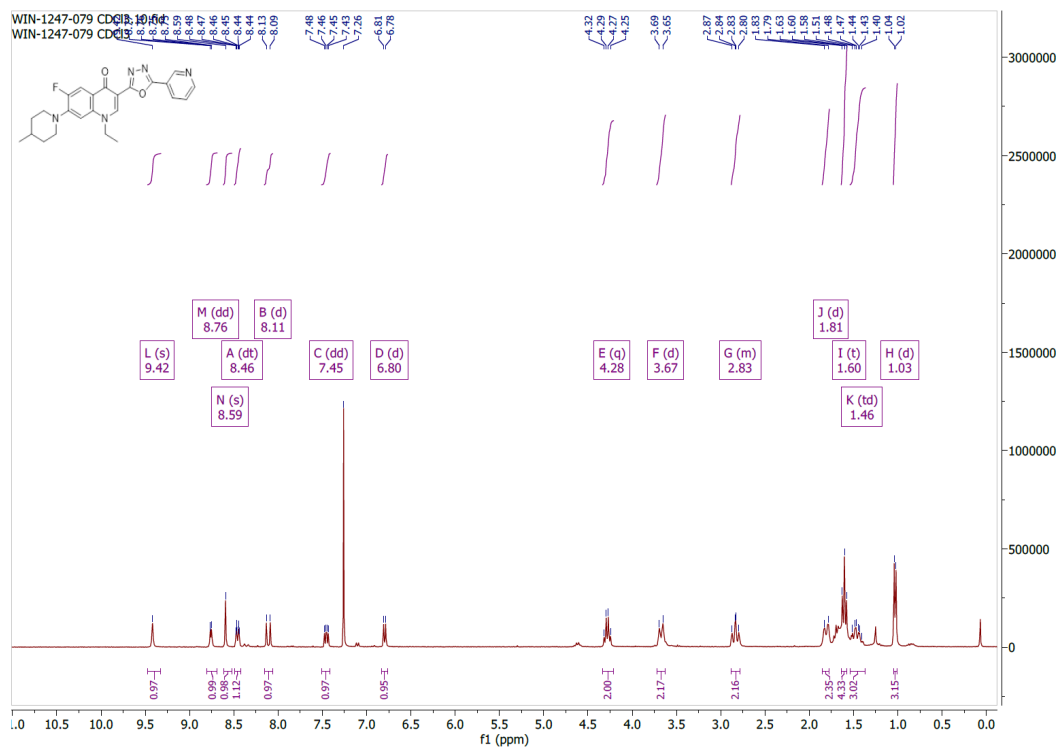

## Compound 17

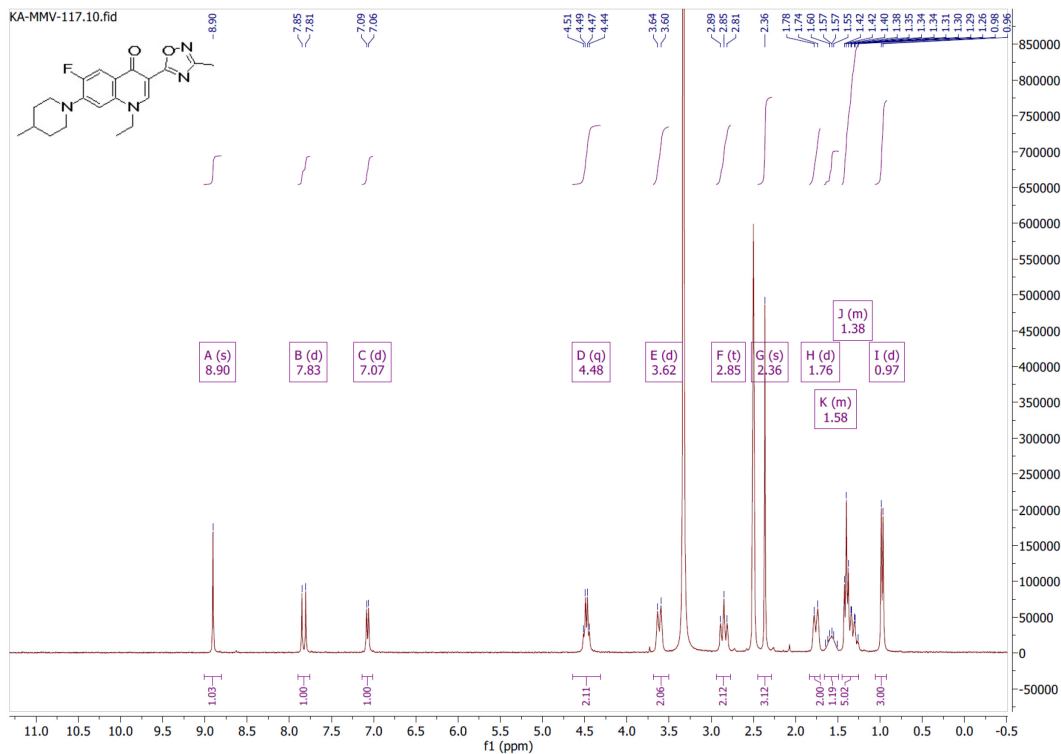



# Compound 18

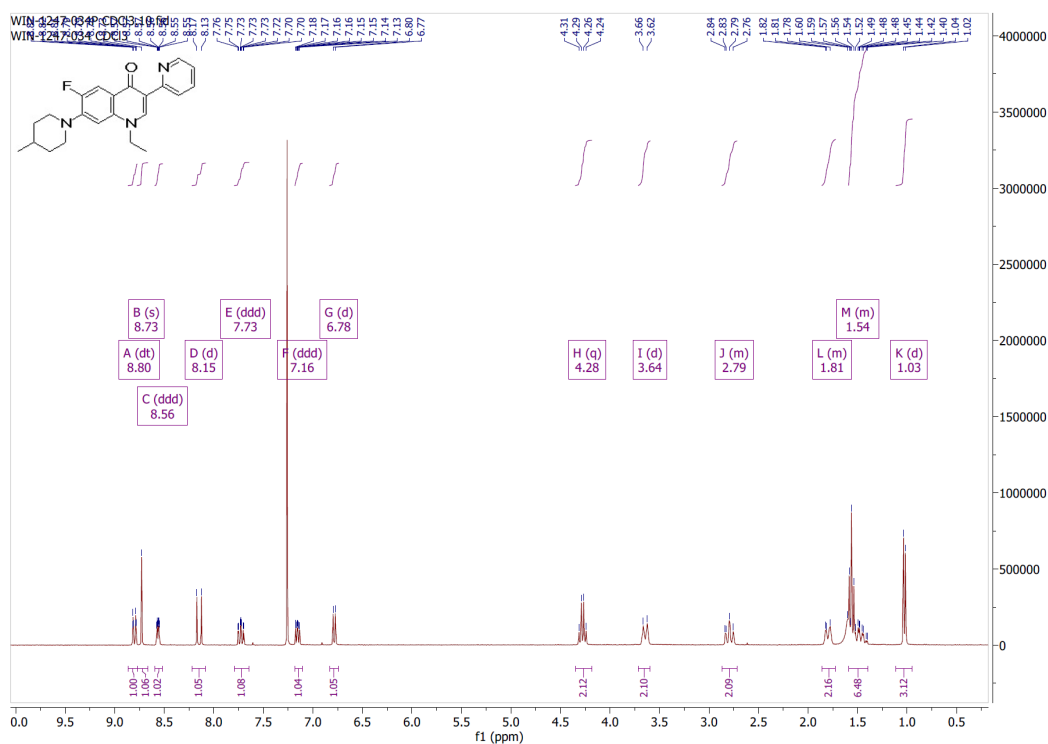

# Compound 19

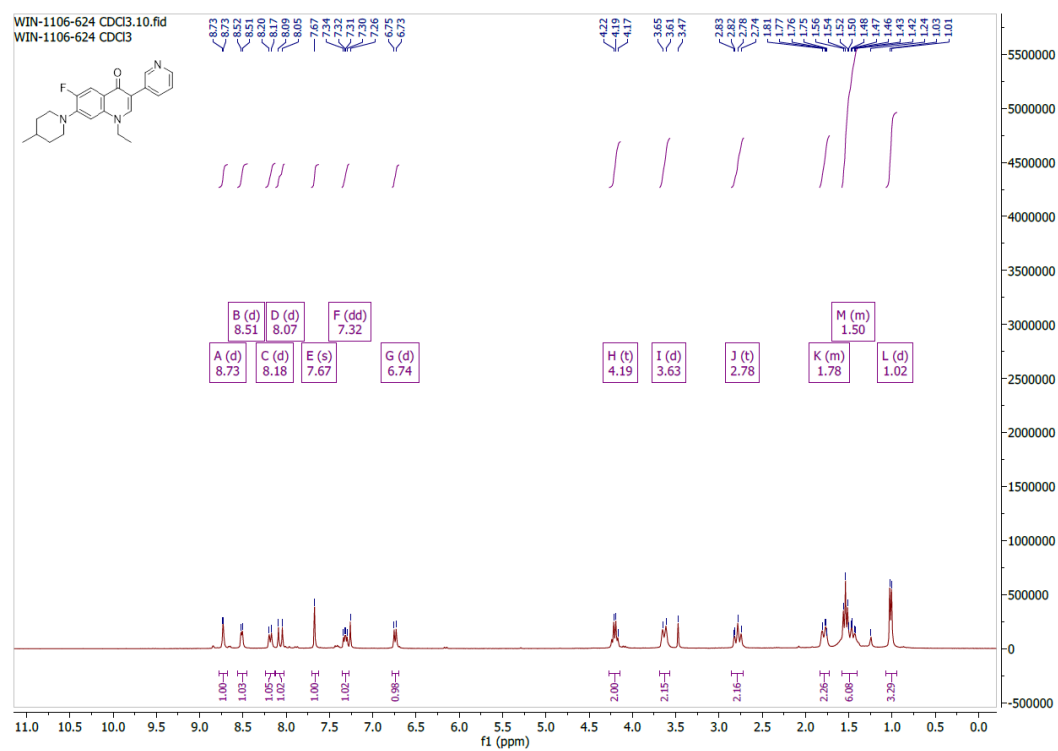

## Compound 20

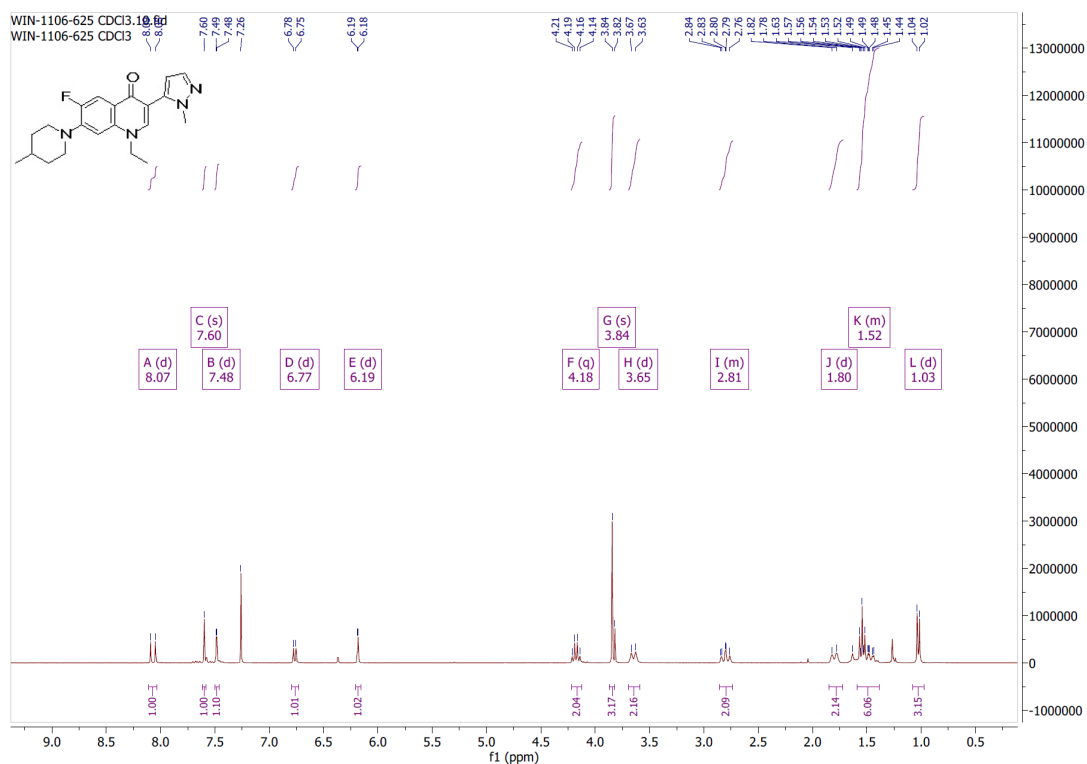

## Compound 21

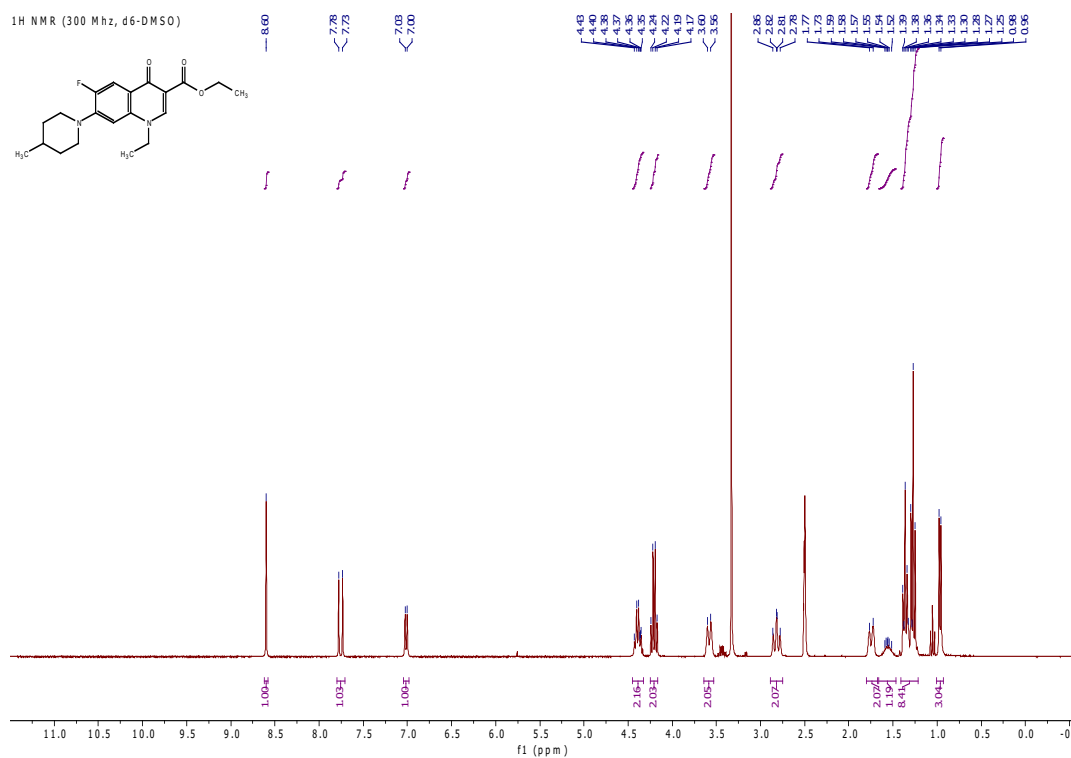

## Compound 22

<sup>1</sup>H NMR (300 Mhz, d6-DMSO)

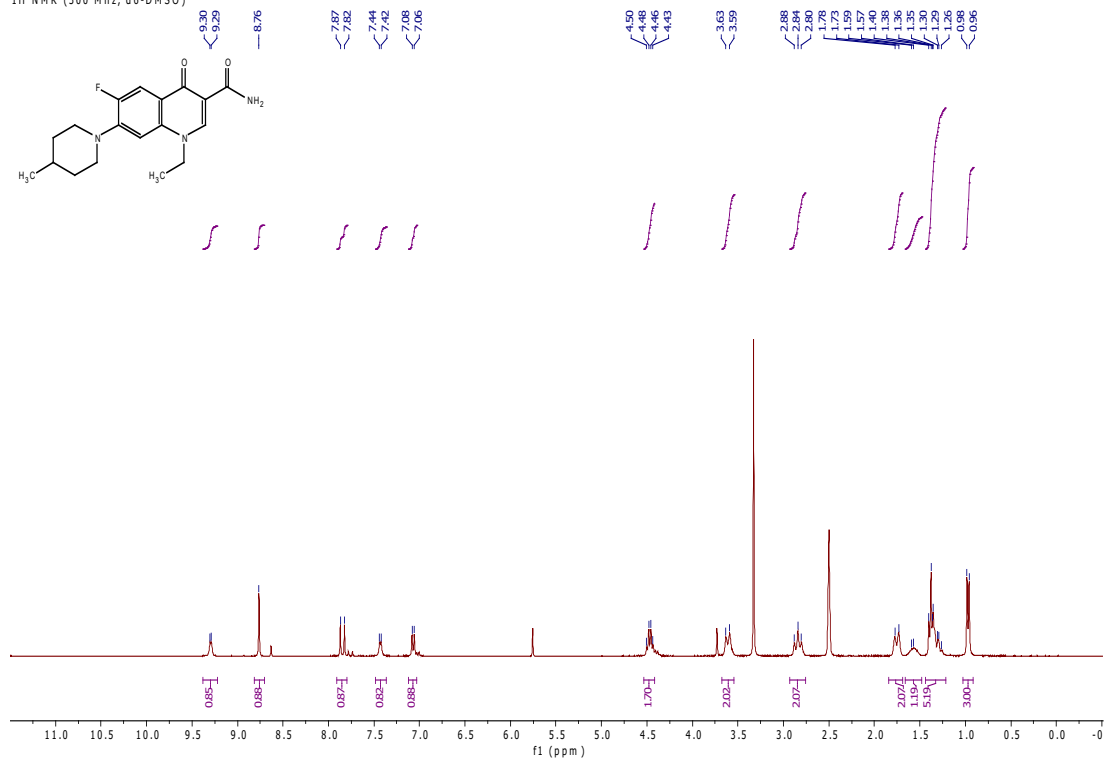

## Compound 23

<sup>1</sup>H NMR (300 Mhz, d6-DMSO)

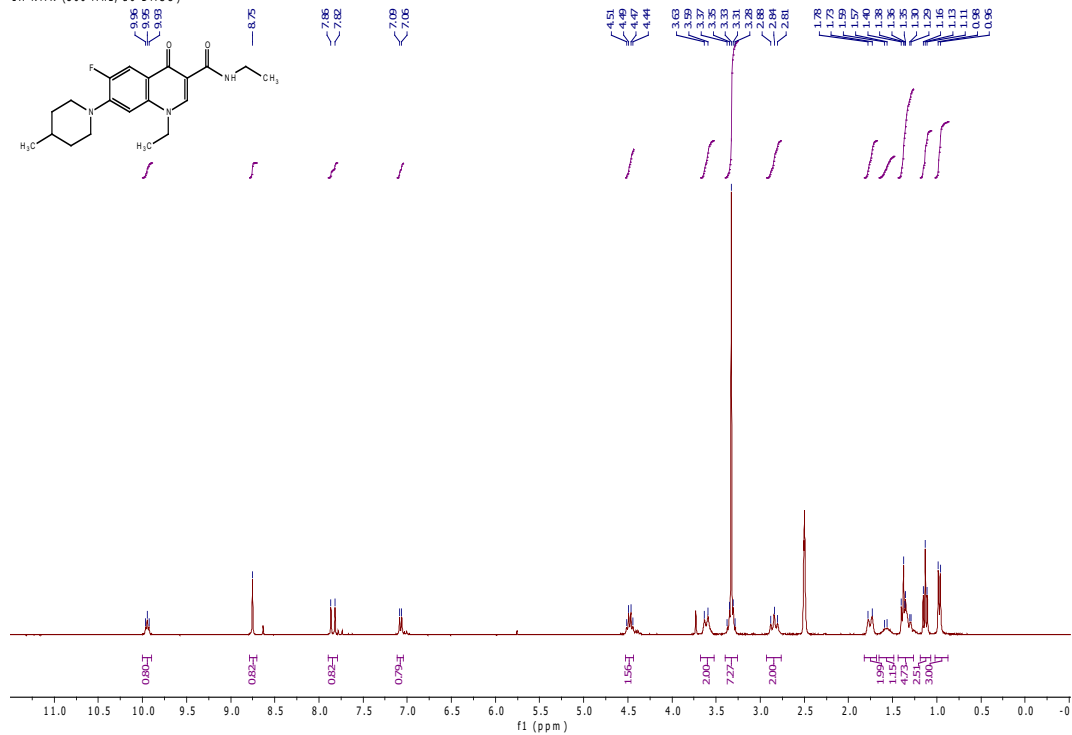

# Compound 24

<sup>1</sup>H NMR (300 Mhz, d6-DMSO)

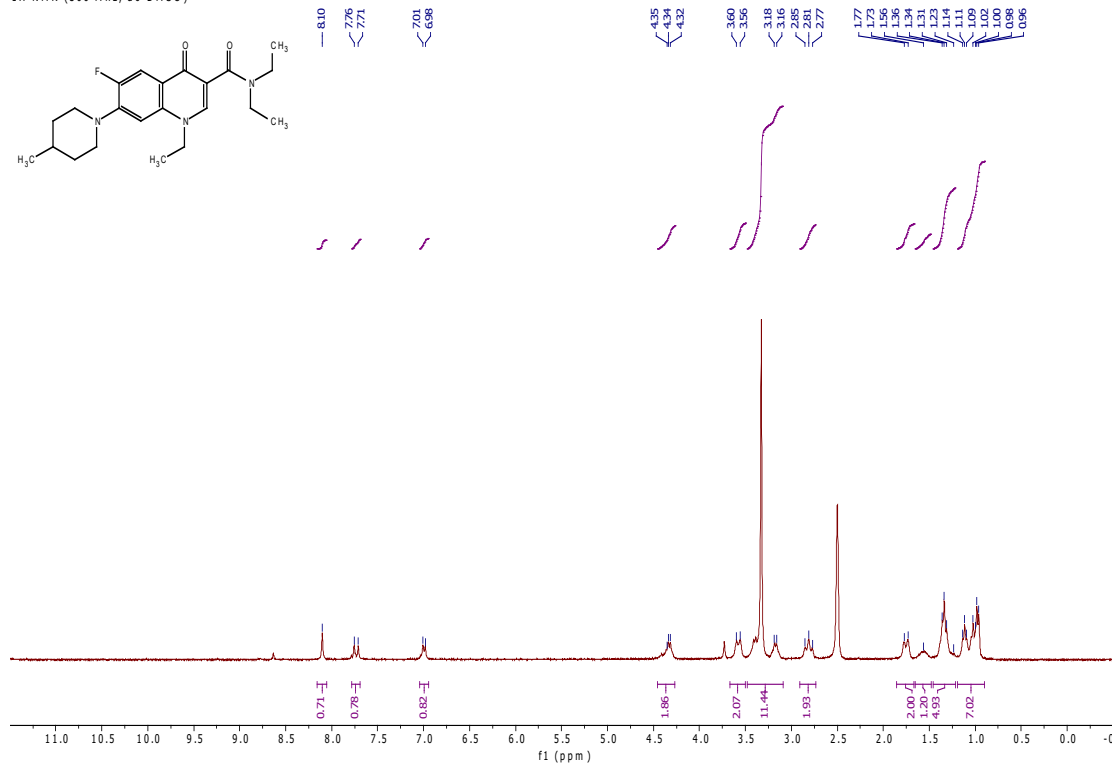

# Compound 25

WIN-1106-613 DMSO.10.fid  
WIN-1106-613 DMSO

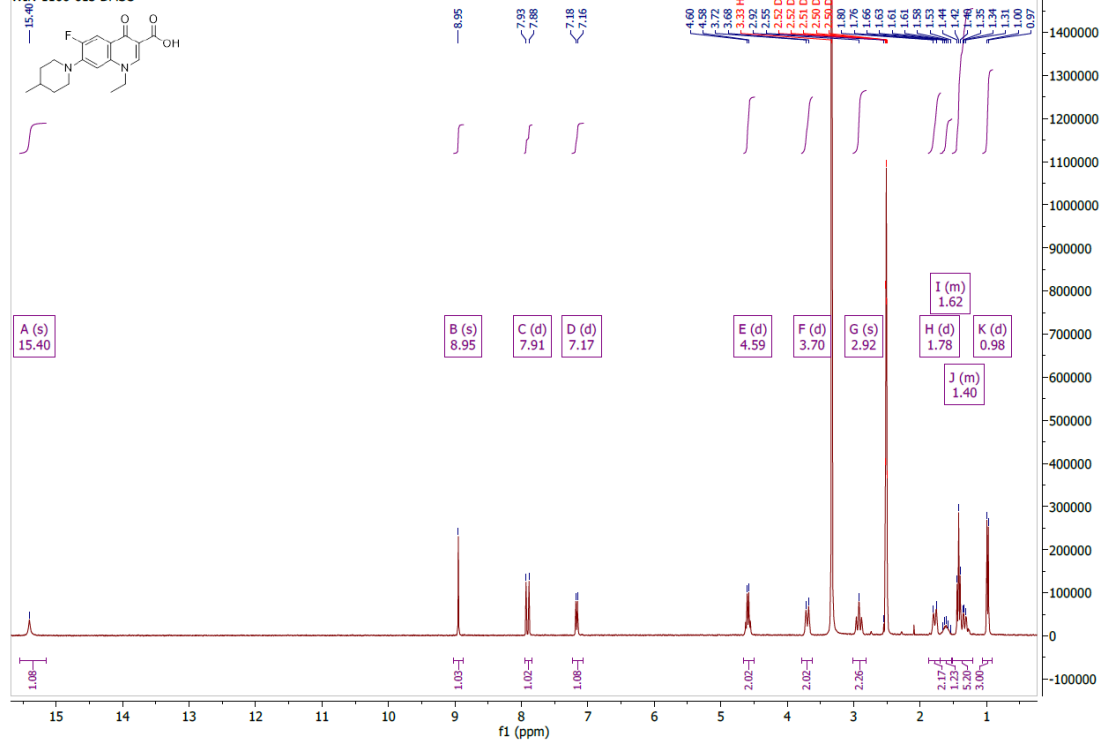

## Compound 26

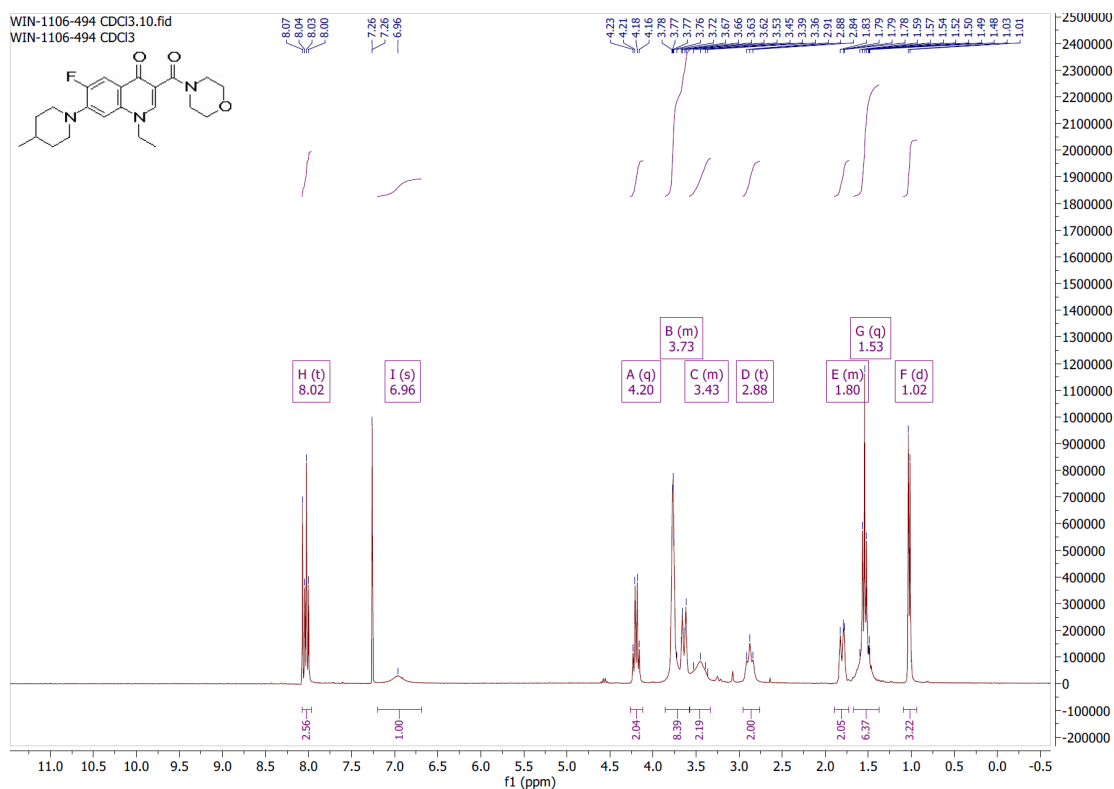

## Compound 27

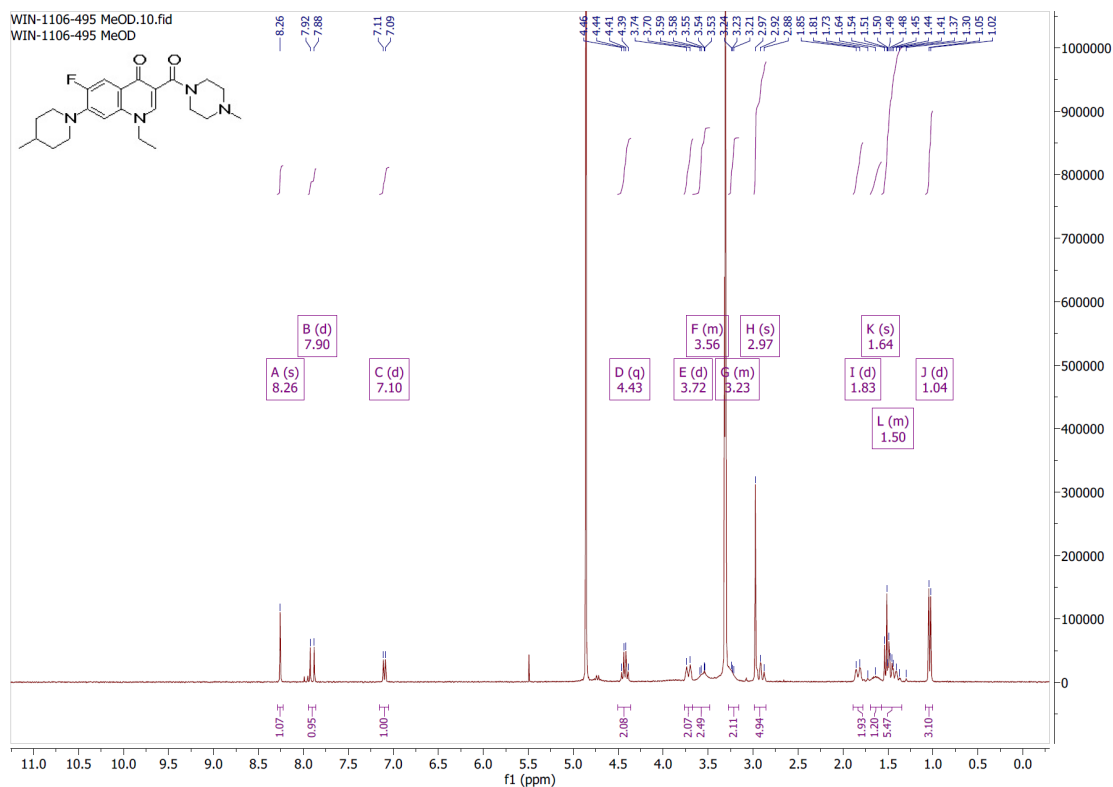

## Compound 28

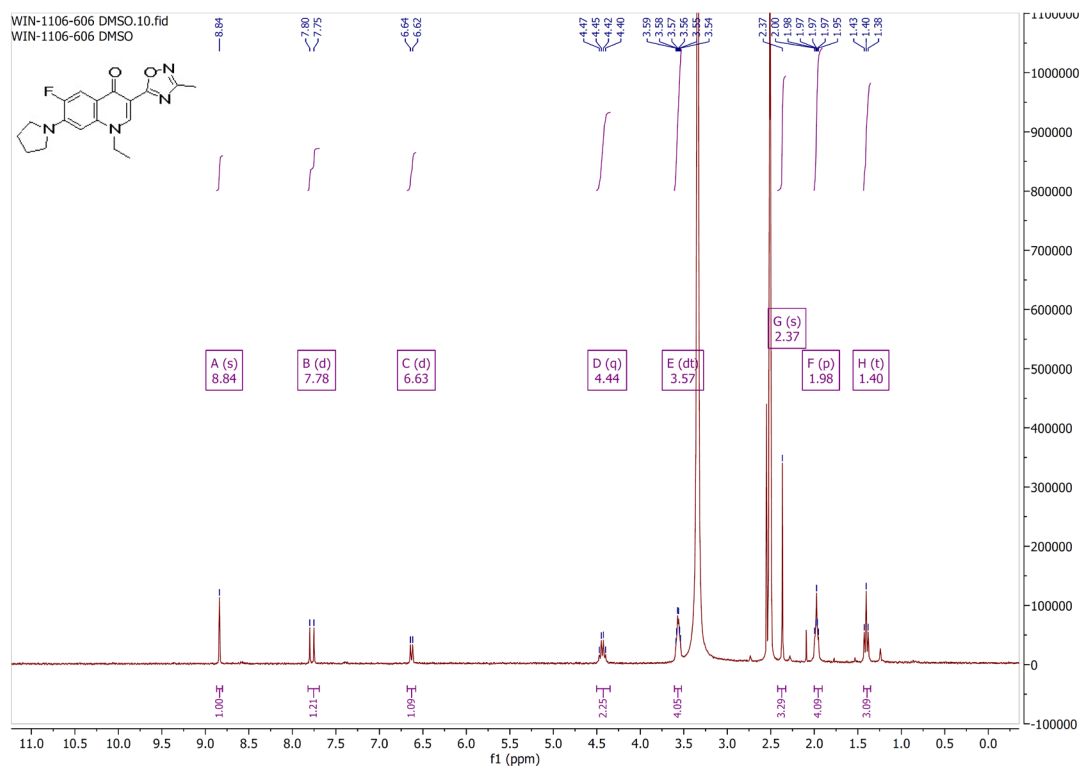

## Compound 29

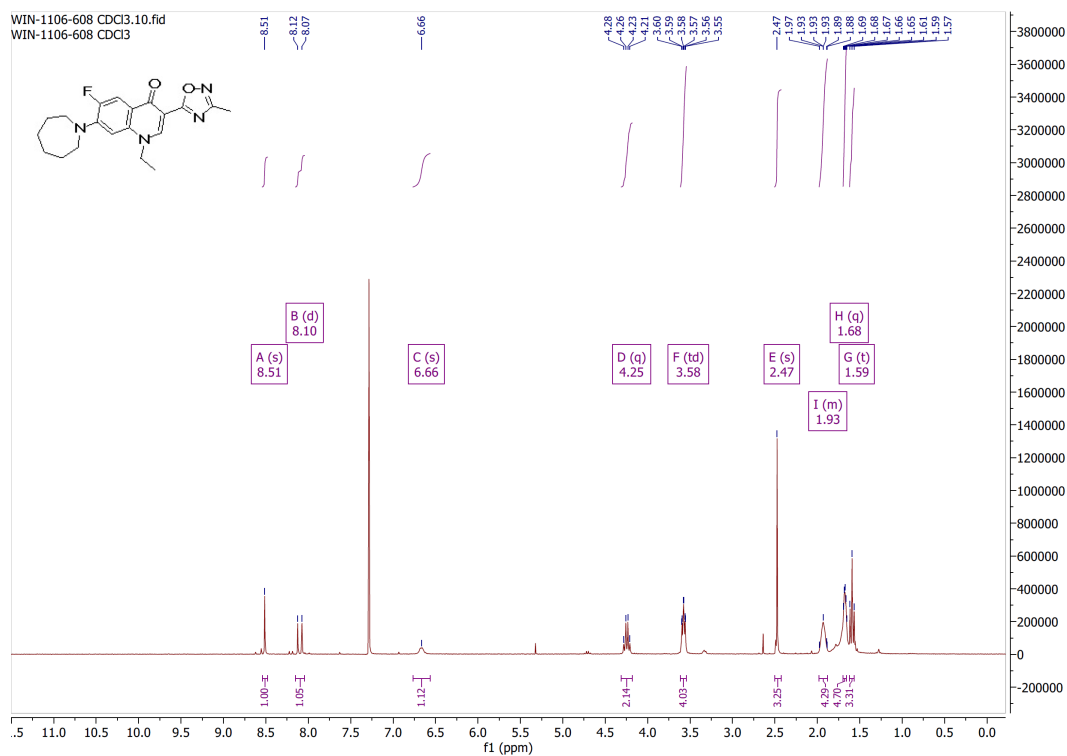

## Compound 30

<sup>1</sup>H NMR (300 Mhz, d6-DMSO)

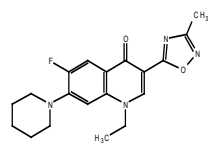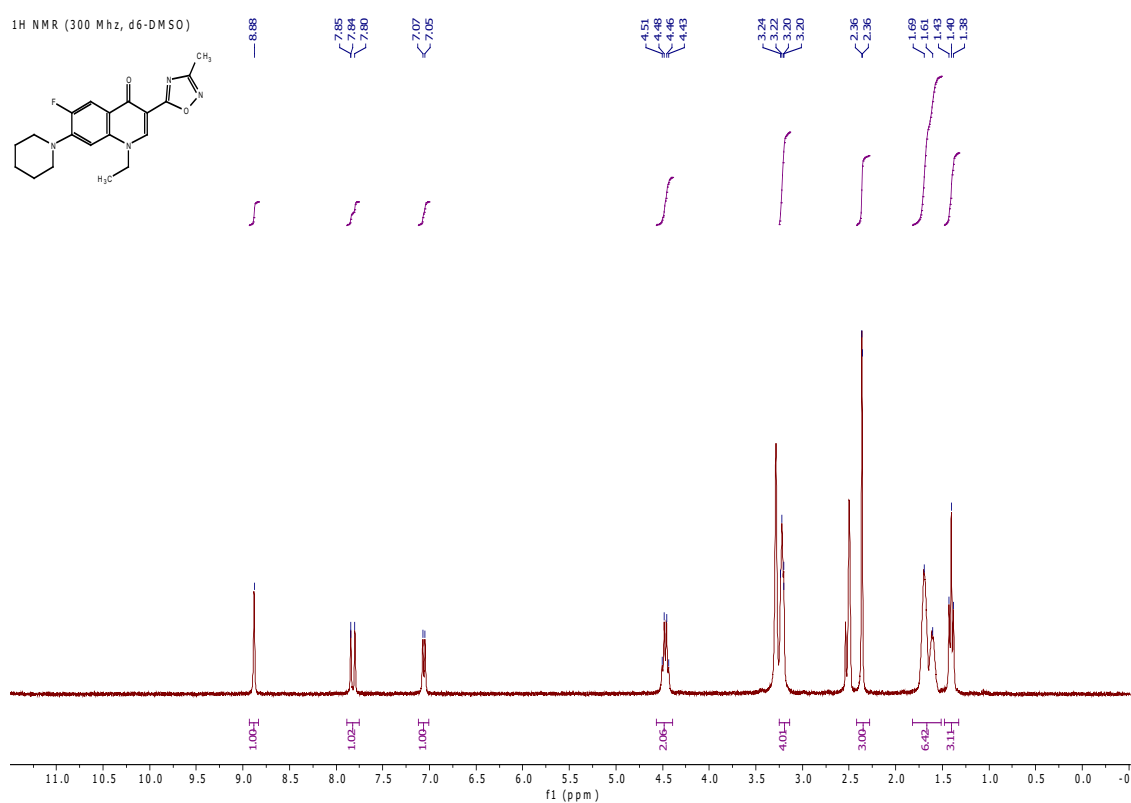

## Compound 31

<sup>1</sup>H NMR (300 Mhz, d6-DMSO)

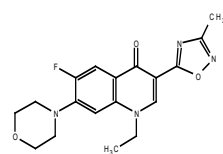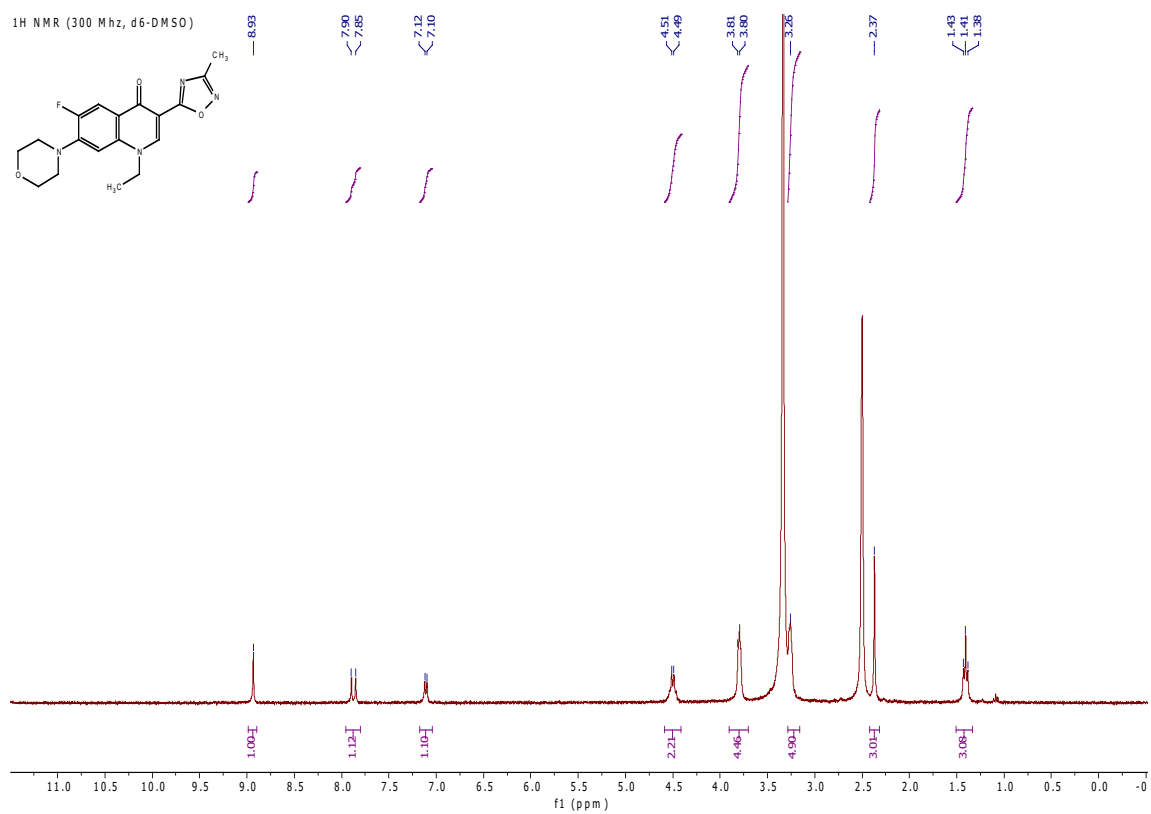

## Compound 32

<sup>1</sup>H NMR (300 MHz, d6-DMSO)

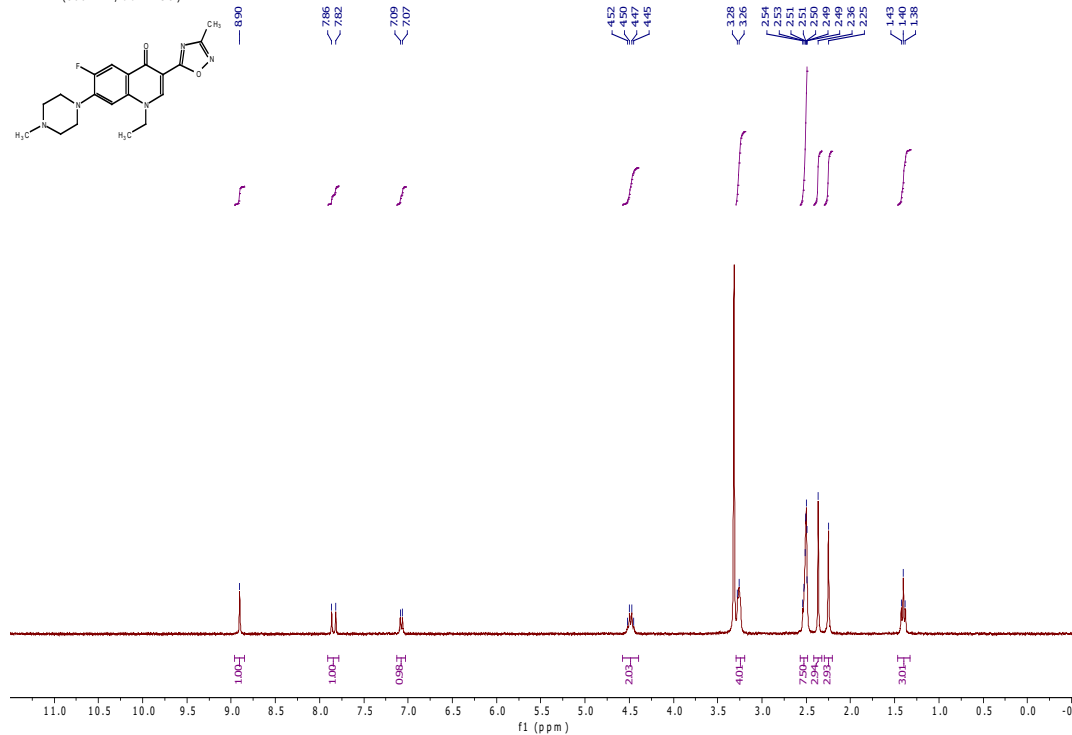

## Compound 33

WIN-1106-517 CDCl3.10.fid  
WIN-1106-517 CDCl3

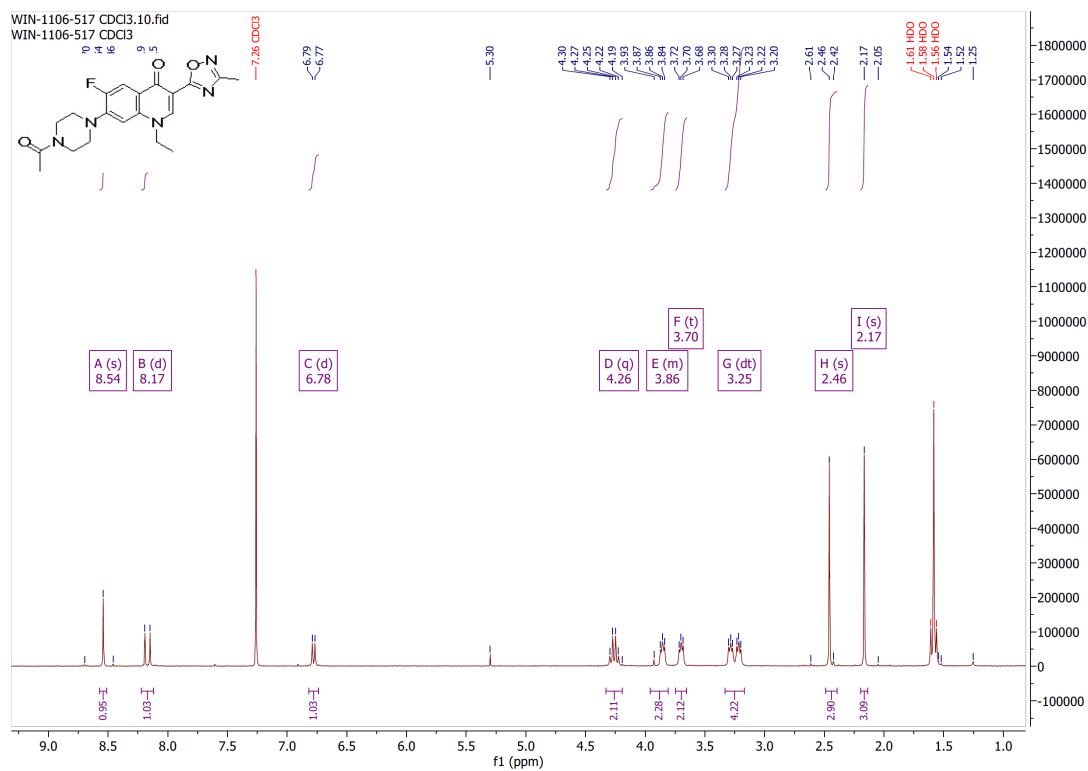



## Compound 34

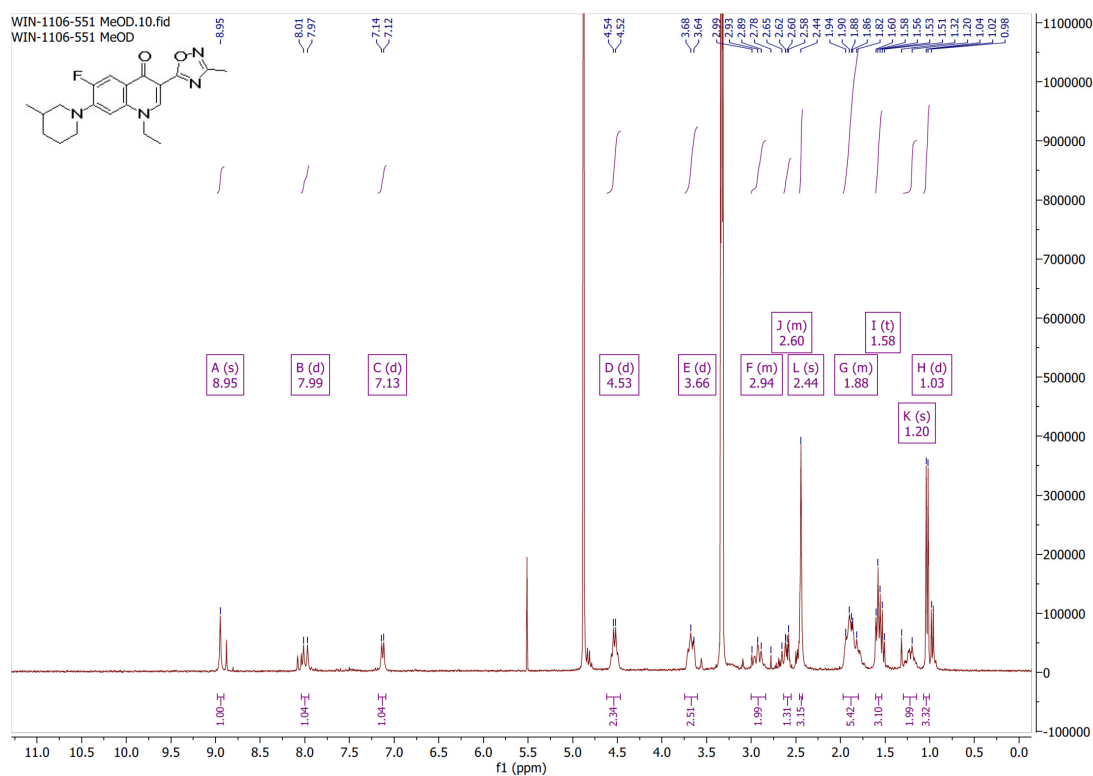

## Compound 35

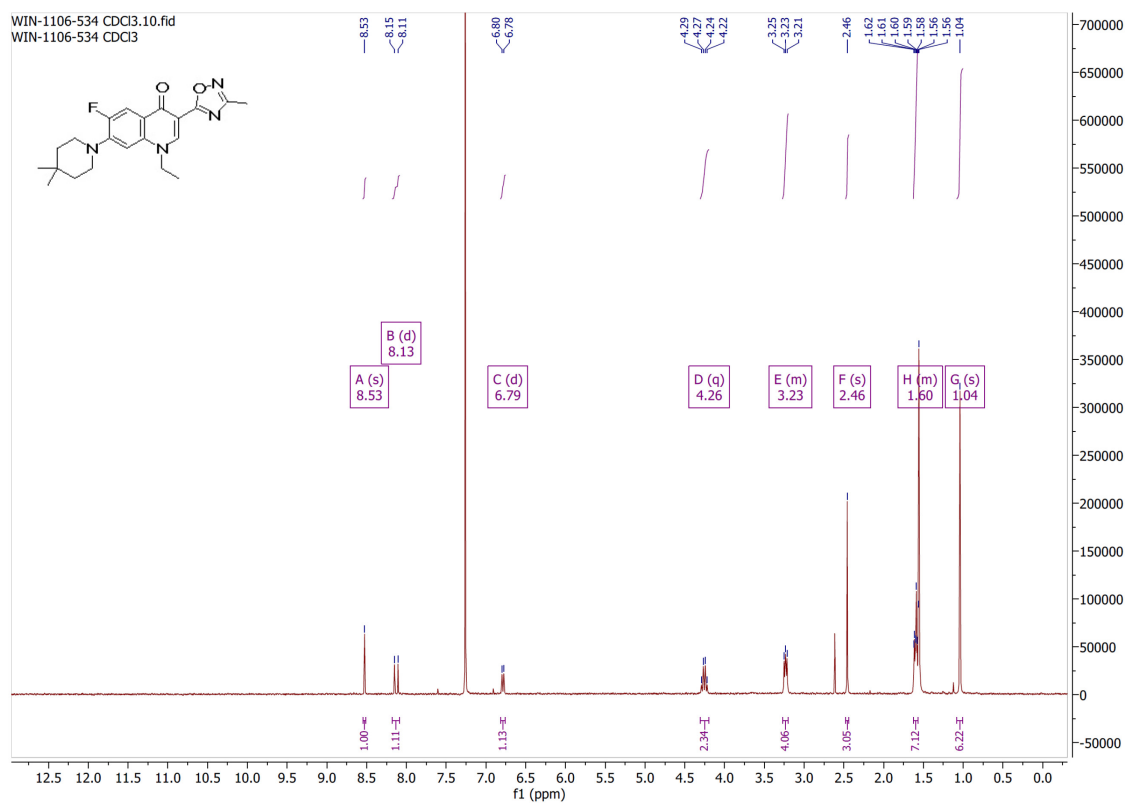

# Compound 36

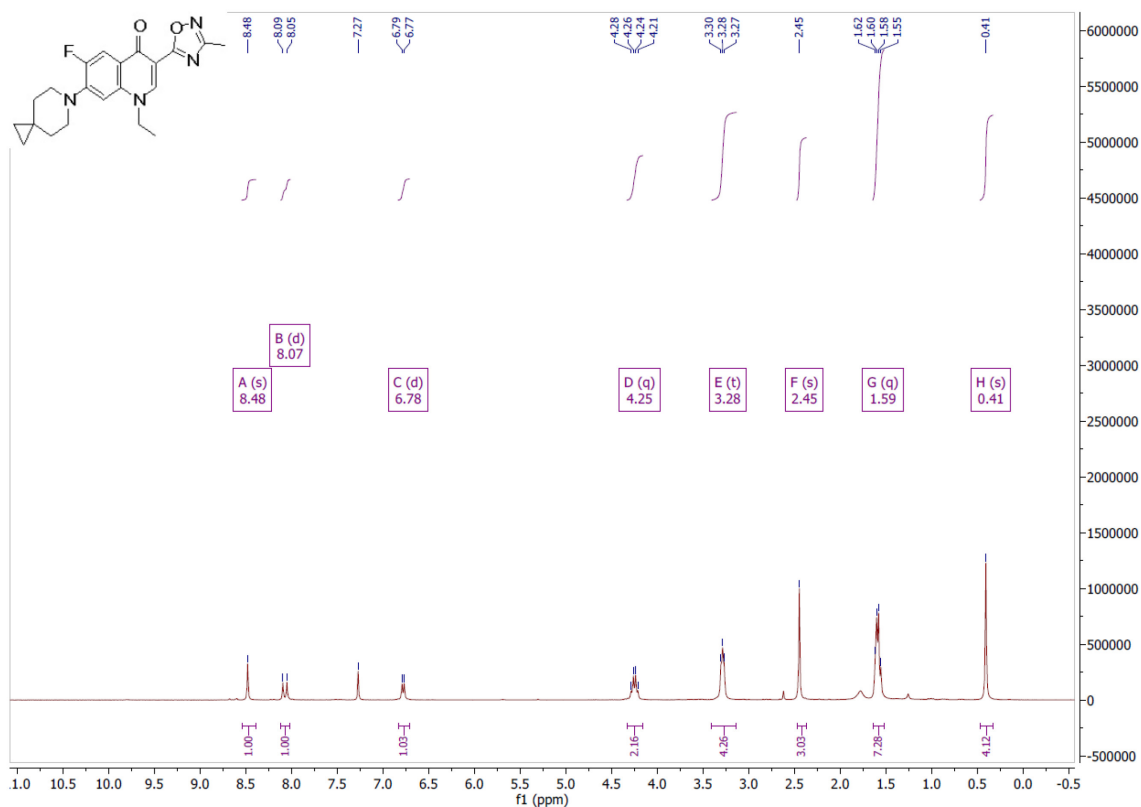

# Compound 37

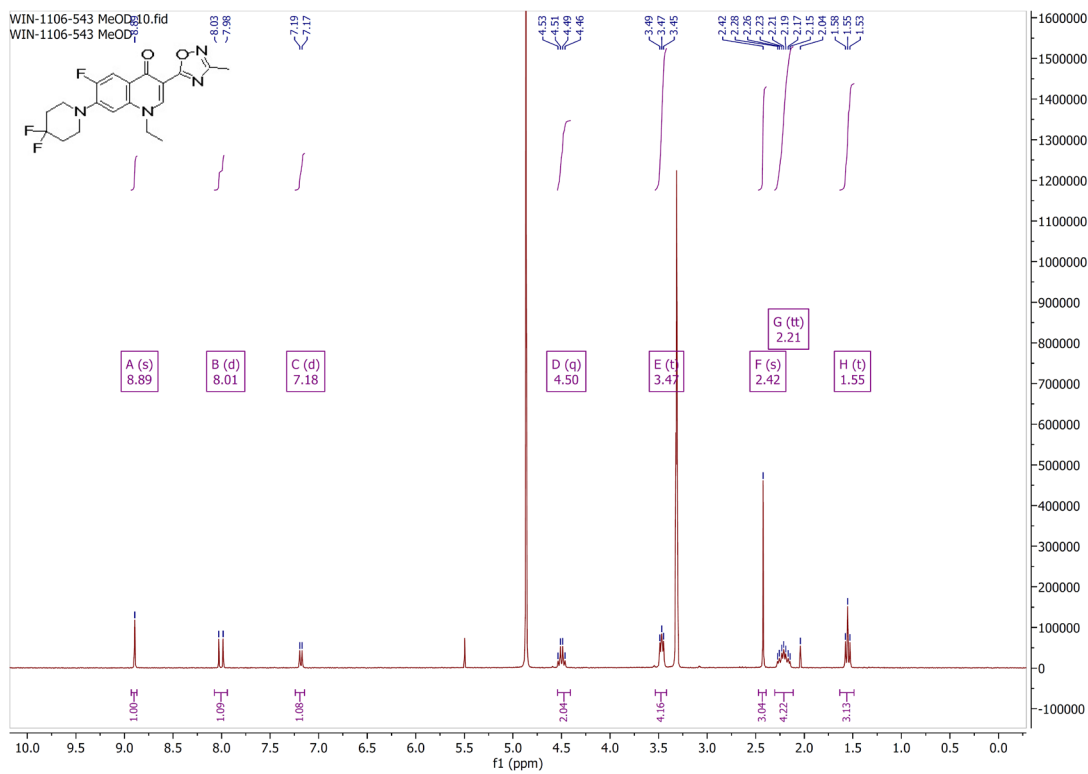

# Compound 38

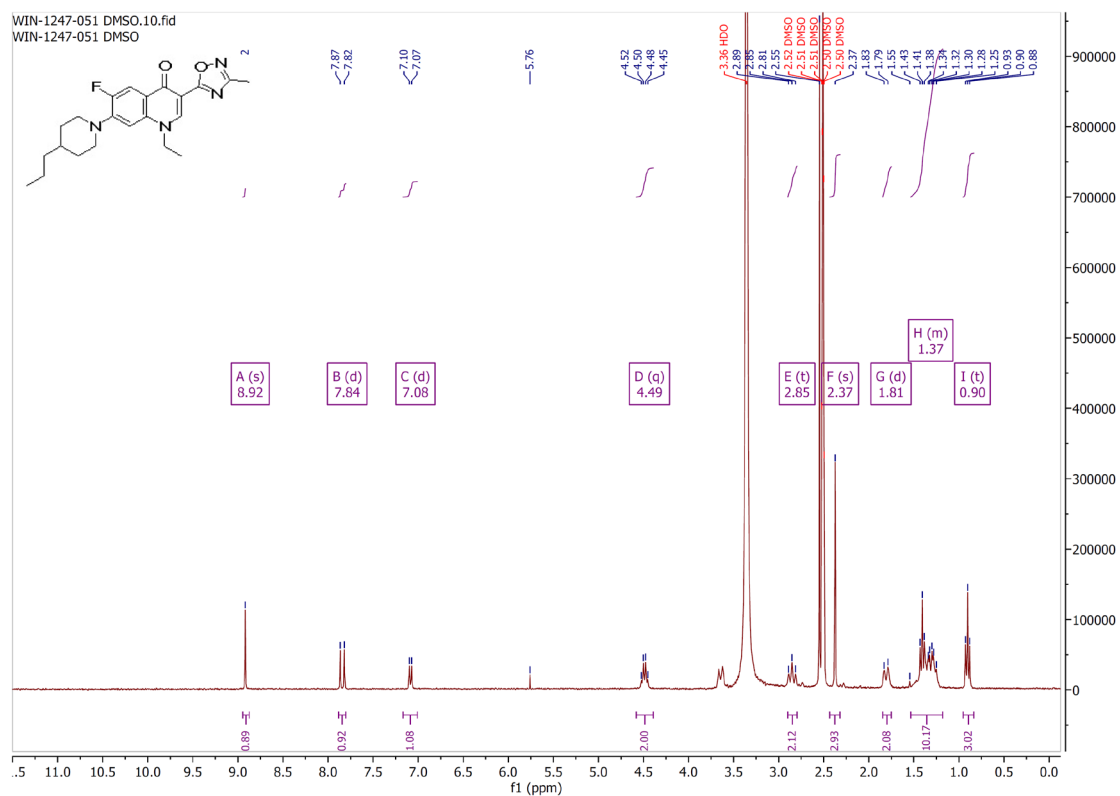

# Compound 39

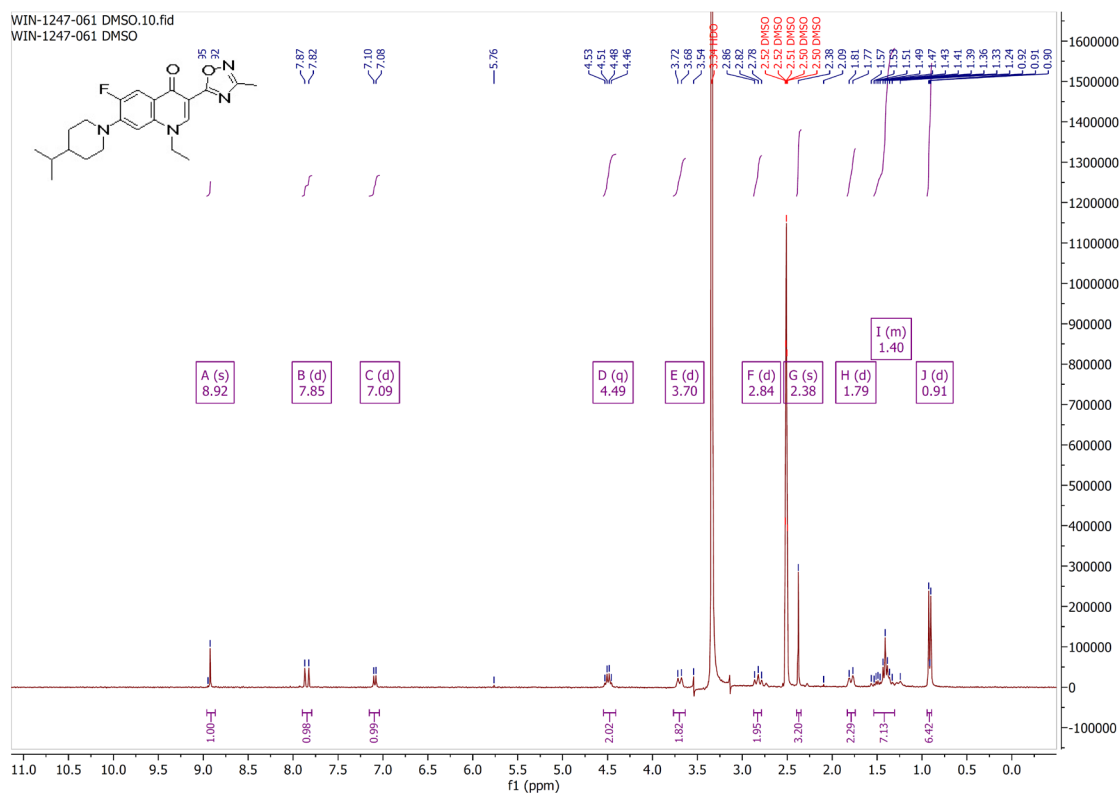

## Compound 40

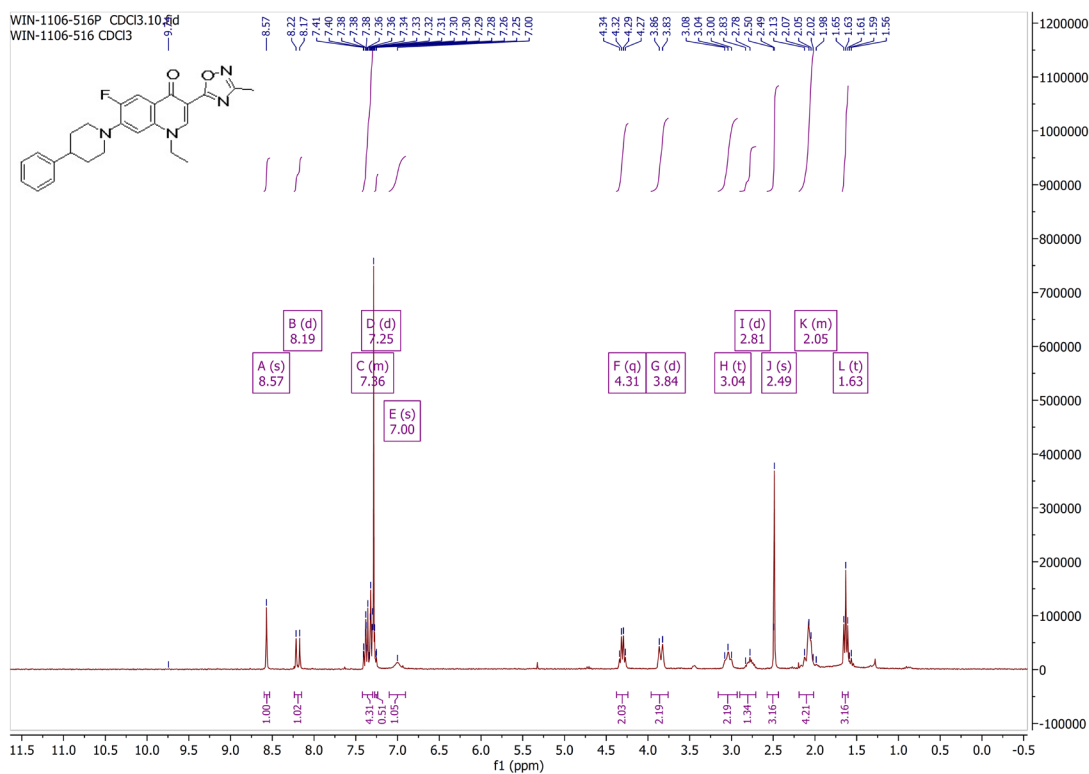

## Compound 41

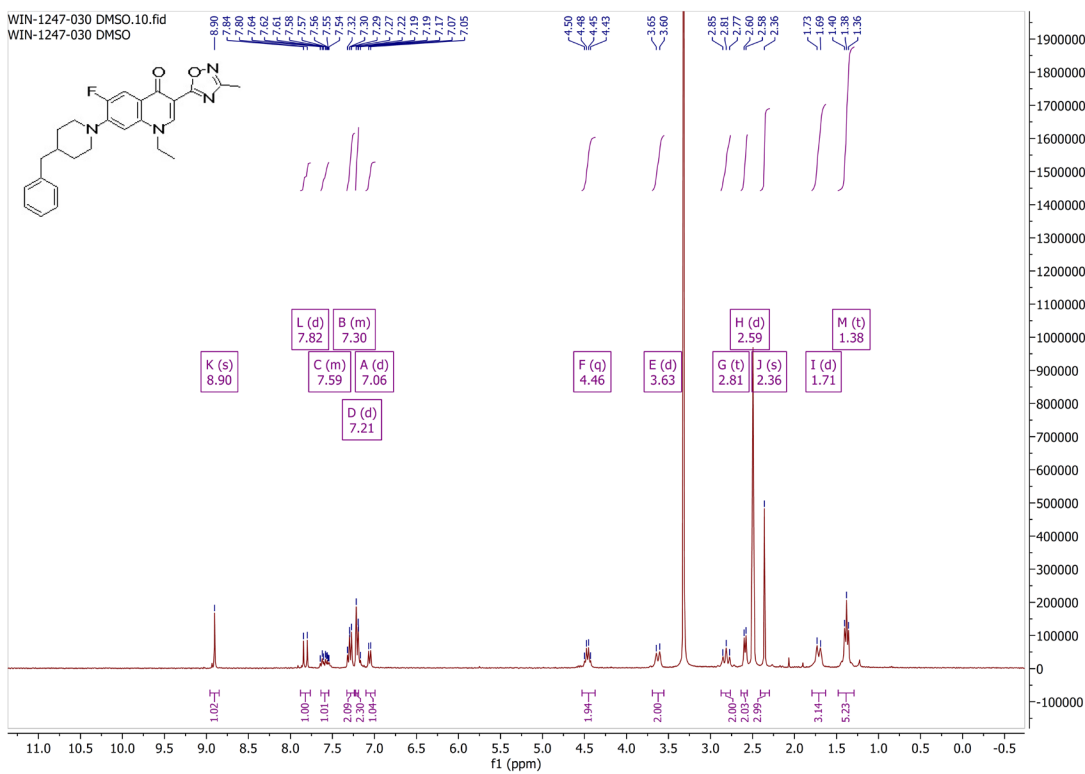

## Compound 42

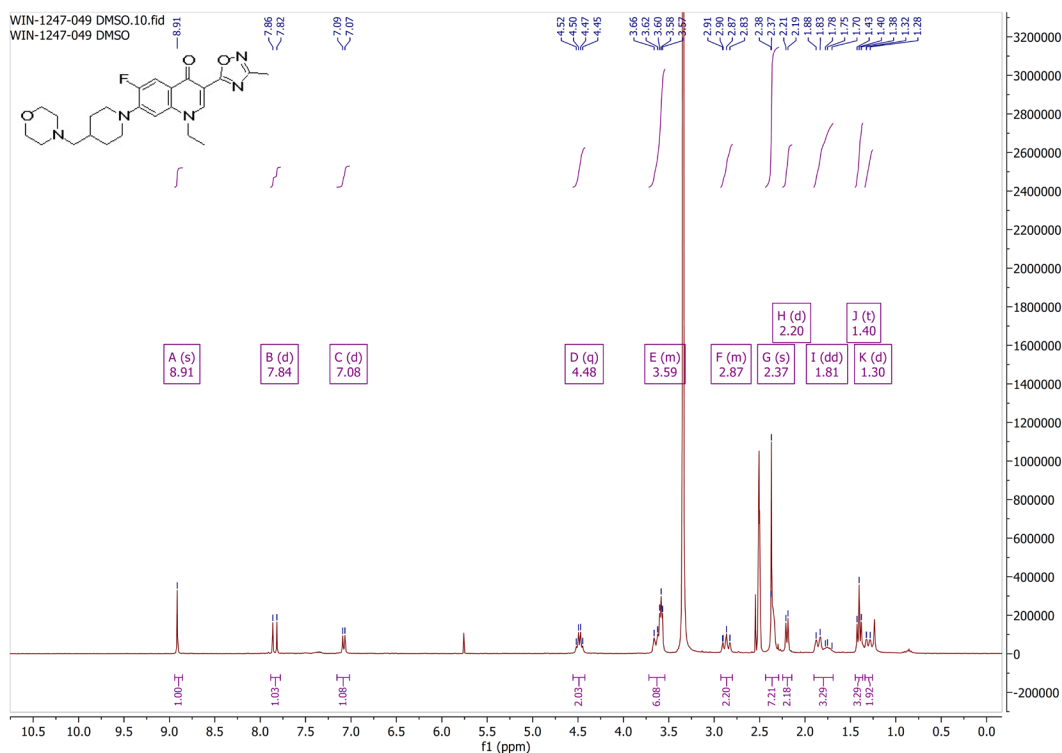

## Compound 43

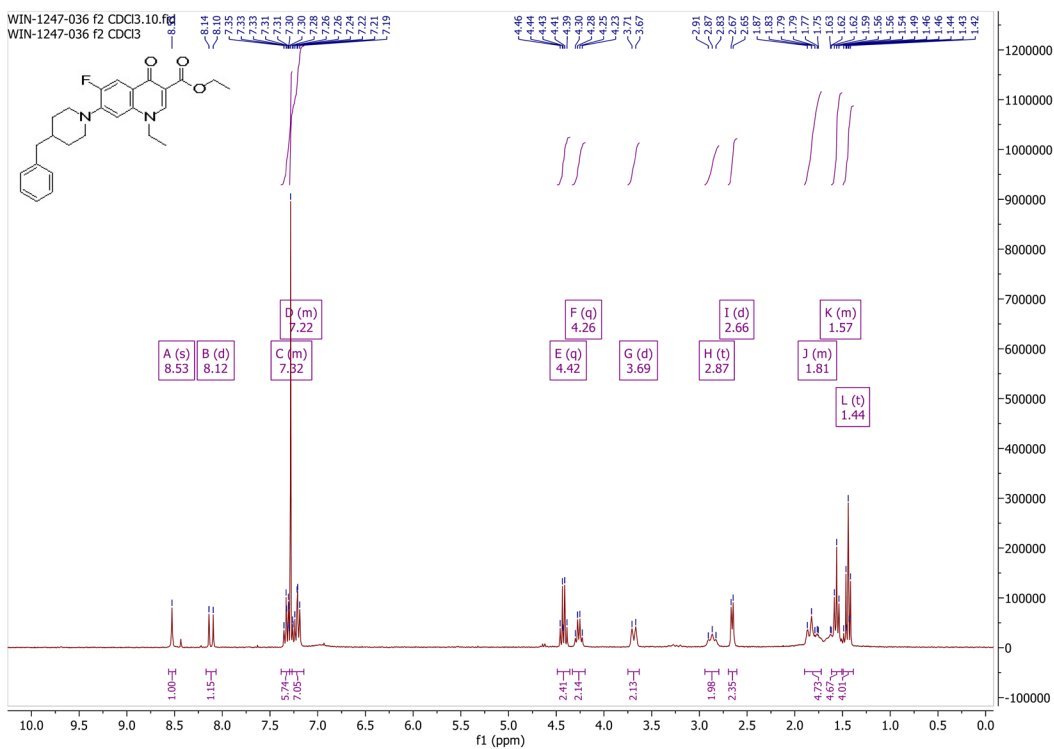

# Compound 44

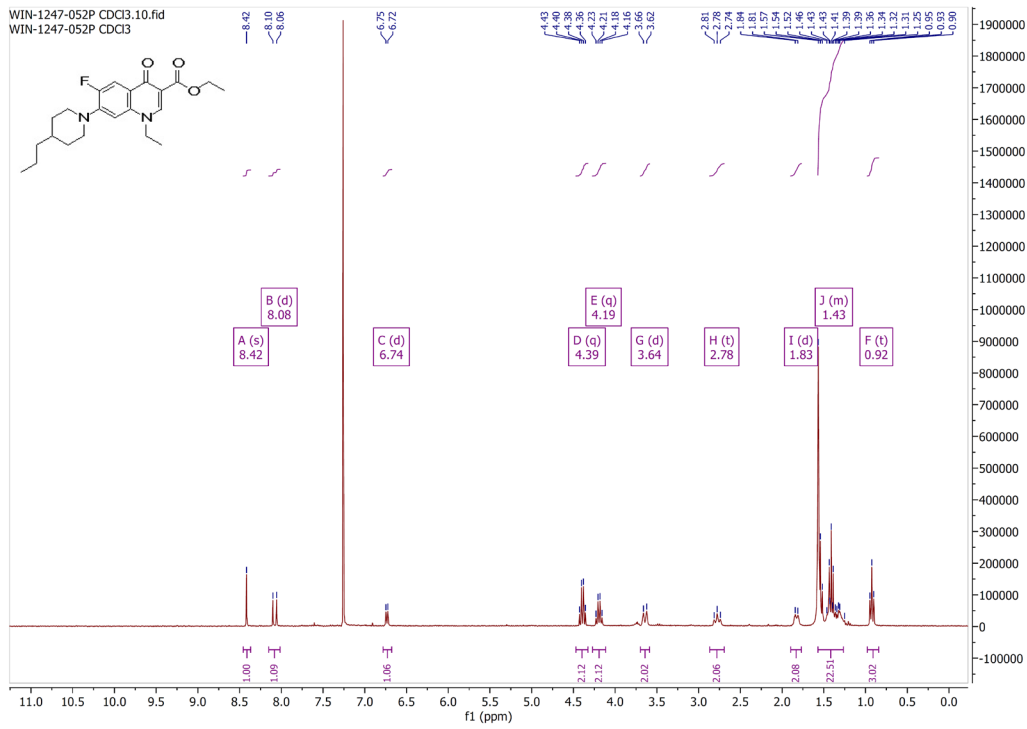

## HPLC traces for final compounds

### Compound 16

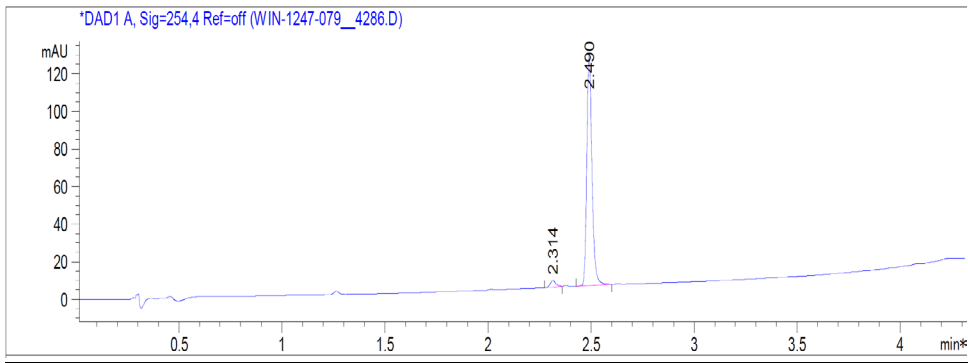

### Compound 17

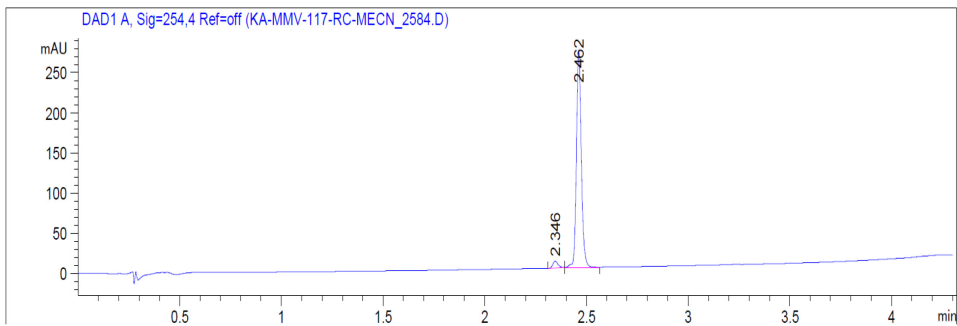

### Compound 18

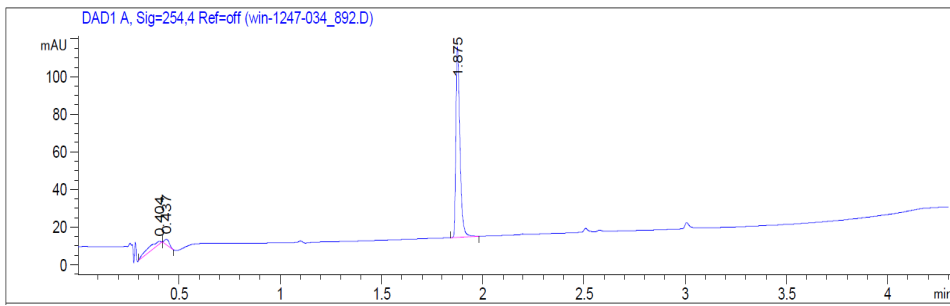

### Compound 19

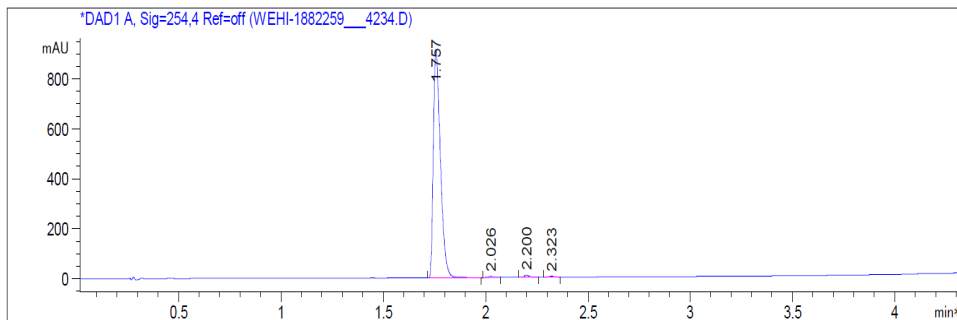

### Compound 21

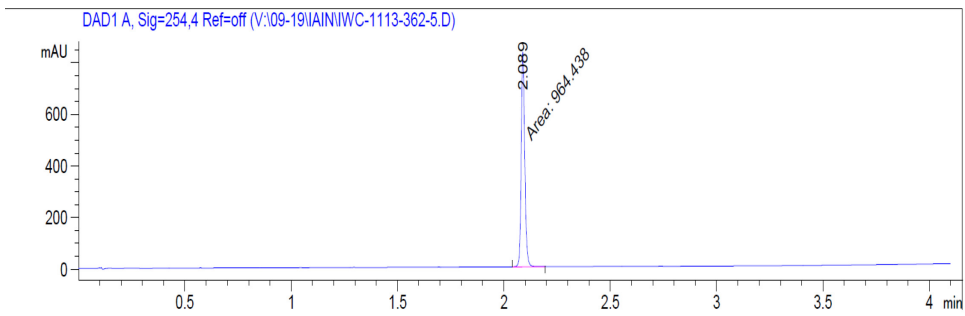

### Compound 22

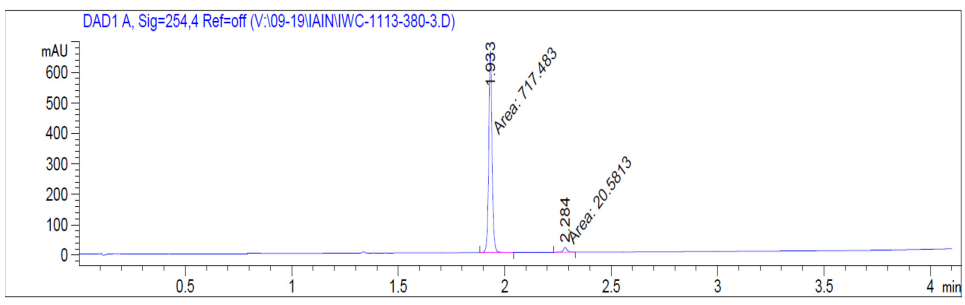

### Compound 25

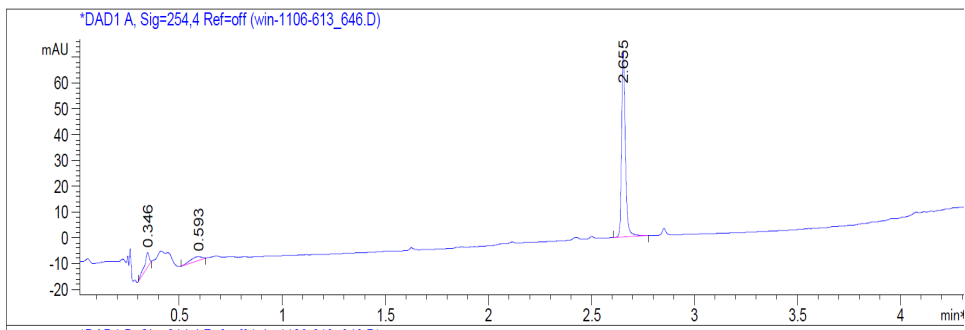

### Compound 26

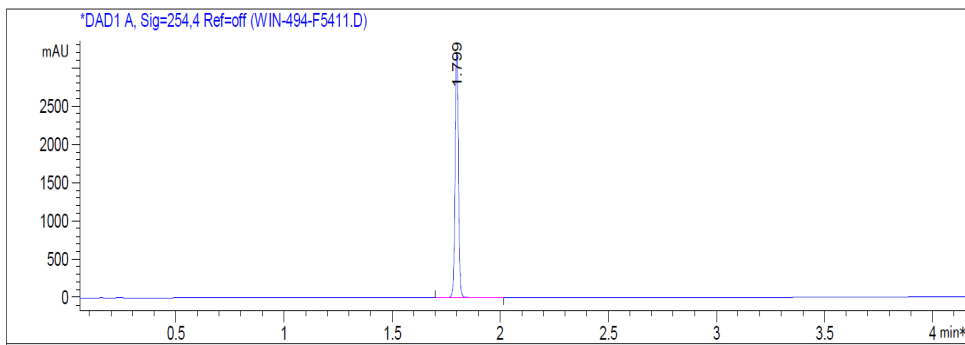



### Compound 27

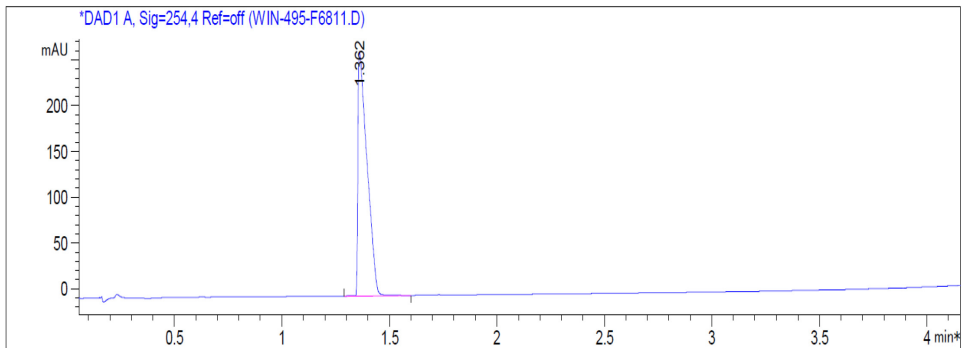

### Compound 28

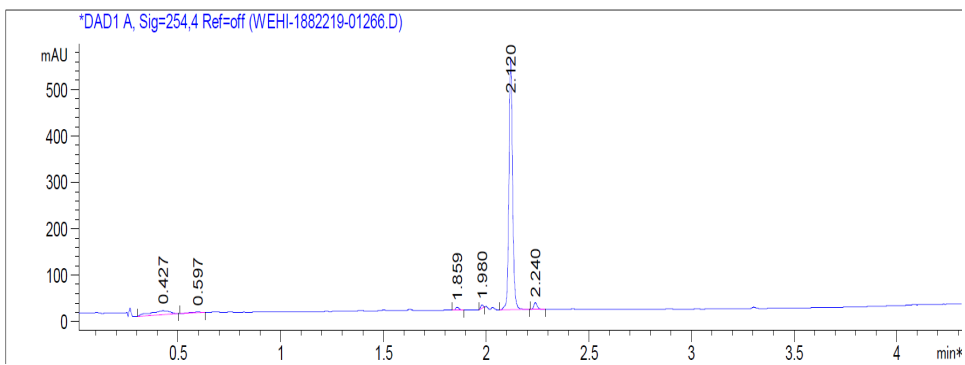

### Compound 29

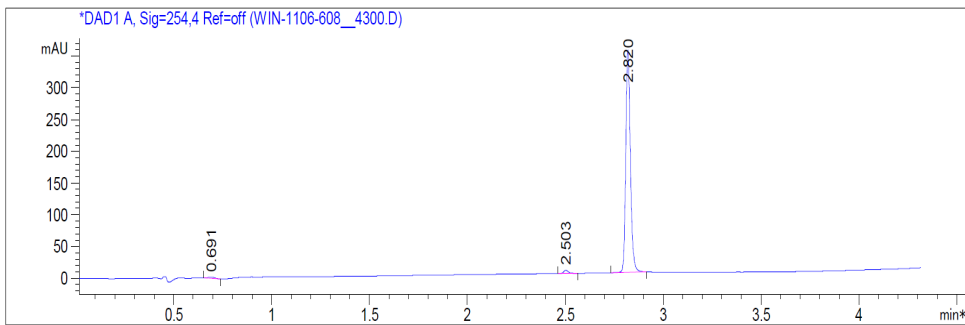

### Compound 30

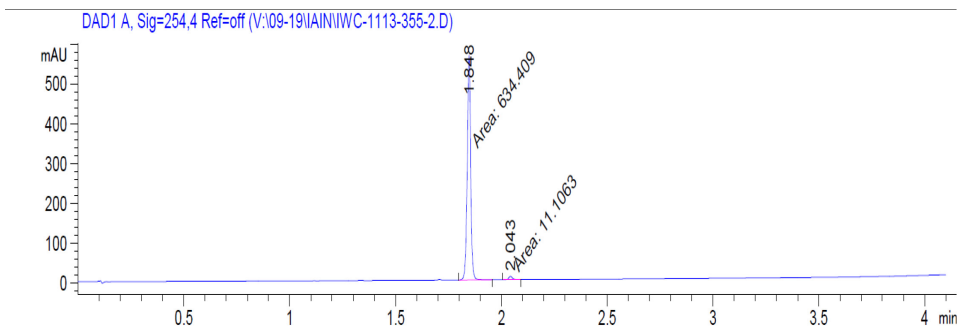



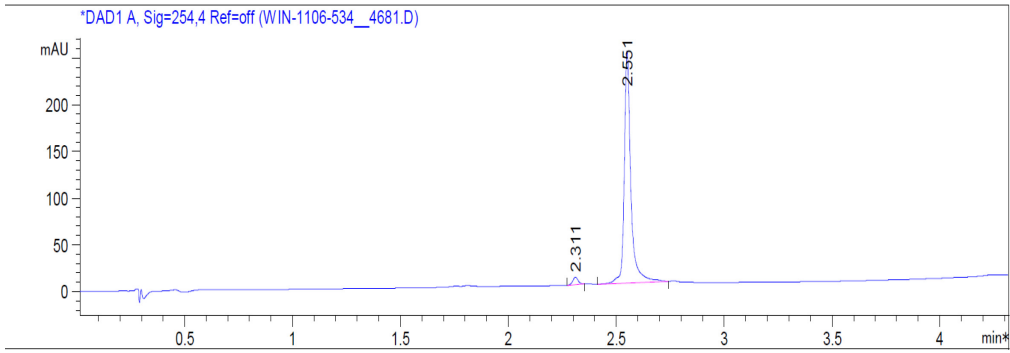

### Compound 37

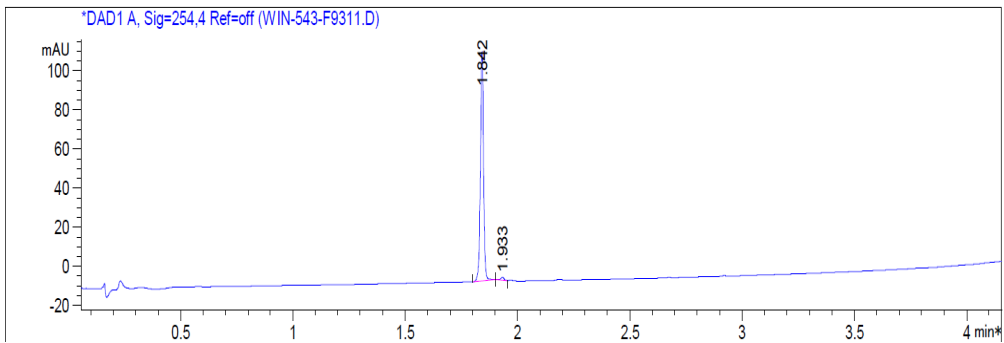

### Compound 39

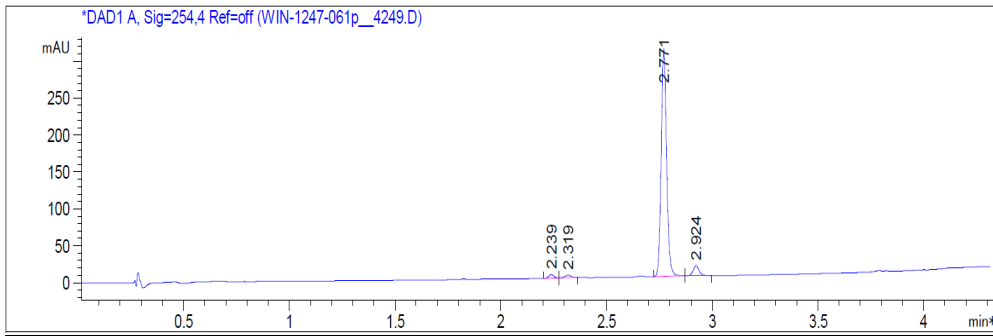

### Compound 40

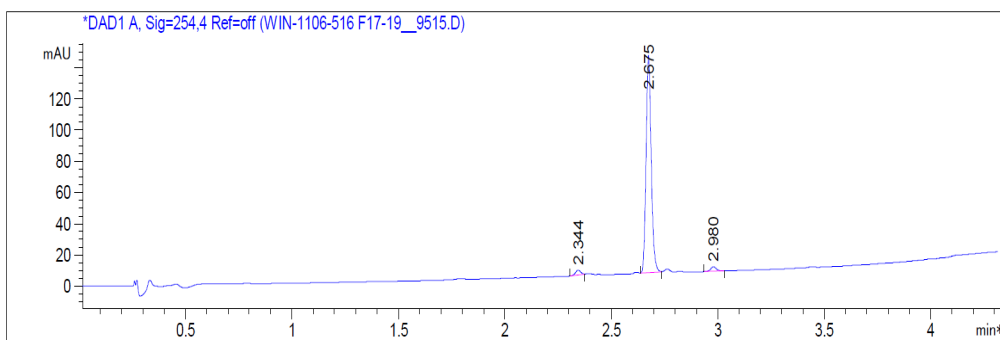

### Compound 41

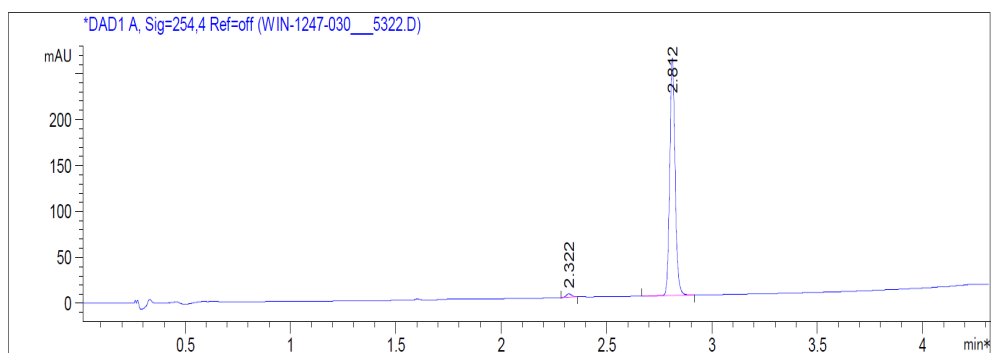

### Compound 43

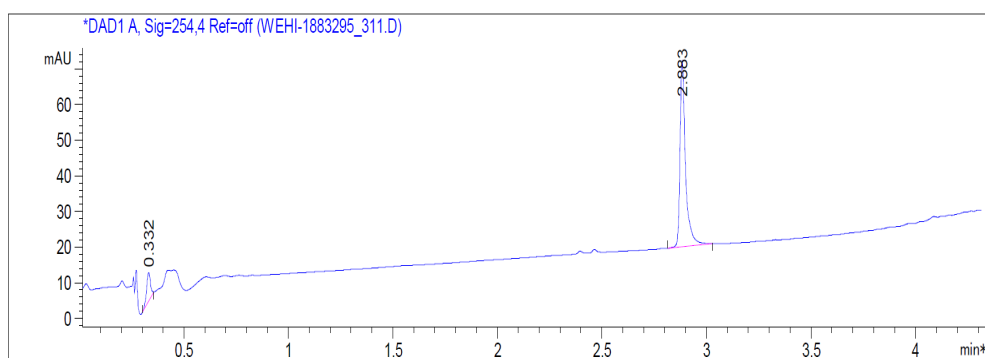

### Compound 44

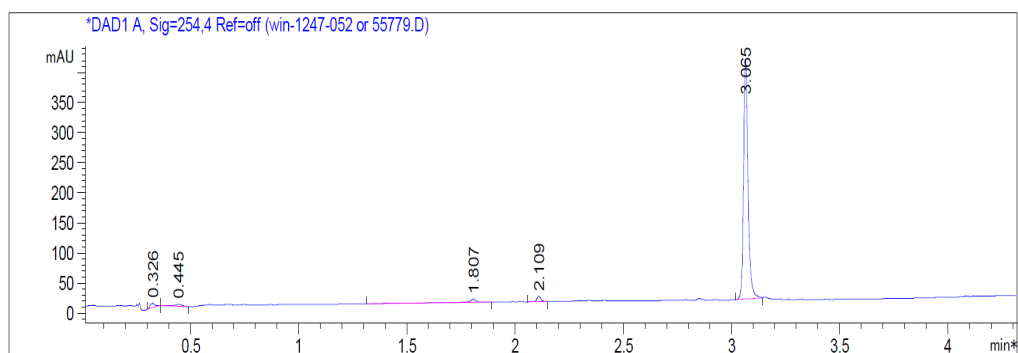

## References

1. Zhang, Z.; Huang, L.; Shulmeister, V. M.; Chi, Y. I.; Kim, K. K.; Hung, L. W.; Crofts, A. R.; Berry, E. A.; Kim, S. H., Electron transfer by domain movement in cytochrome bc1. *Nature* **1998**, *392* (6677), 677-84.
2. Birth, D.; Kao, W.-C.; Hunte, C., Structural analysis of atovaquone-inhibited cytochrome bc1 complex reveals the molecular basis of antimalarial drug action. *Nat. Commun.* **2014**, *5* (1), 4029.
3. Capper, M. J.; O'Neill, P. M.; Fisher, N.; Strange, R. W.; Moss, D.; Ward, S. A.; Berry, N. G.; Lawrenson, A. S.; Hasnain, S. S.; Biagini, G. A.; Antonyuk, S. V., Antimalarial 4(1H)-pyridones bind to the Qi site of cytochrome bc1. *Proc. Natl. Acad. Sci. U.S.A.* **2015**, *112* (3), 755-760.
